# Supplementary material for: Selective hydroxylation of benzene to phenol via CuII(μ-O˙)CuII intermediate using a nonsymmetric dicopper catalyst
Source: Royal Society of Chemistry journal article supplement (doi:10.1039/d4dt02872d), 2024-12-05
Supplement: d4dt02872d1.pdf [file d4dt02872d1.pdf]

## Supplementary Information

### Selective Hydroxylation of Benzene to Phenol via $\text{Cu}^{\text{II}}(\mu\text{-O}\cdot)\text{Cu}^{\text{II}}$ intermediate by a Nonsymmetric Dicopper Catalyst

Qin-Qin Hu,<sup>a</sup> Qi-Fa Chen,<sup>a</sup> Hong-Tao Zhang<sup>\*a</sup>, Jia-Yi Chen<sup>\*b</sup>, Rong-Zhen Liao<sup>b</sup> and Ming-Tian Zhang<sup>\*a</sup>

<sup>a</sup>Center of Basic Molecular Science (CBMS), Department of Chemistry, Tsinghua University, Beijing 100084, China

<sup>b</sup>Key Laboratory of Material Chemistry for Energy Conversion and Storage, Ministry of Education, Hubei Key Laboratory of Bioinorganic Chemistry and Materia Medica, Hubei Key Laboratory of Materials Chemistry and Service Failure, School of Chemistry and Chemical Engineering, Huazhong University of Science and Technology, Wuhan 430074, China

\*E-mail: zhanght18@tsinghua.org.cn;jiayi@hust.edu.cn; mtzhang@mail.tsinghua.edu.cn

## Experimental Section

**Materials.** Commercially available chemicals and solvents were used as received unless otherwise noted. The synthesis routes of  $[\text{Cu}_2(\text{TPMAN})(\mu\text{-OH})(\text{H}_2\text{O})](\text{CF}_3\text{SO}_3)_3$  (**1**( $\text{CF}_3\text{SO}_3$ )<sub>3</sub>) came from our reported literature.<sup>1,2</sup>

**Instrumentation.** GC data were obtained on a Shimadzu 2010 Plus GC system containing an Rxi®-5ms capillary column. Nitrobenzene was used as a standard. NMR spectra were obtained on NMR spectrometer with 400 MHz for <sup>1</sup>H NMR.

Abbreviations

**TPMAN:** 1-(7-((bis(pyridin-2-ylmethyl)amino)methyl)-1,8-naphthyridin-2-yl)-N-methyl-N-(pyridin-2-ylmethyl)methanamine.

**TON:** Turnover number.

**BQ:** *p*-Benzoquinone

**Cov.:** Conversion ratio

## Supplementary tables and figures:

**Table S1.** Screening the reaction condition of the catalyst for hydroxylation of benzene.

| entry | [cat.1]( $\mu\text{M}$ ) | [H <sub>2</sub> O <sub>2</sub> ](M) | base(2 mM)               | [benzene](M) | T °C   | Yield (%) |              | Selectivity (%) |
|-------|--------------------------|-------------------------------------|--------------------------|--------------|--------|-----------|--------------|-----------------|
|       |                          |                                     |                          |              |        | phenol    | benzoquinone |                 |
| 1     | 20                       | 4                                   | Et <sub>3</sub> N        | 0.78         | 45     | 1.36      | 0.2          | 87              |
| 2     | 40                       | 4                                   | Et <sub>3</sub> N        | 0.78         | 45     | 1.91      | 0.82         | 70              |
| 3     | 80                       | 4                                   | Et <sub>3</sub> N        | 0.78         | 45     | 2.3       | 1.15         | 67              |
| 4     | 40                       | 2                                   | Et <sub>3</sub> N        | 0.78         | 45     | 1.15      | 0.19         | 86              |
| 5     | 40                       | 1                                   | Et <sub>3</sub> N        | 0.78         | 45     | 0.14      | 0            | 100             |
| 6     | 40                       | 4                                   | DETA                     | 0.78         | 45     | 2.04      | 0.82         | 71              |
| 7     | 40                       | 4                                   | DBU                      | 0.78         | 45     | 1.94      | 0.83         | 70              |
| 8     | 40                       | 4                                   | Et <sub>3</sub> N(0.4mM) | 0.78         | 45     | 2.02      | 0.81         | 71              |
| 9     | 40                       | 4                                   | Et <sub>3</sub> N        | 0.78         | 35     | 0.93      | 0.79         | 54              |
| 10    | 40                       | 4                                   | Et <sub>3</sub> N        | 0.78         | 55     | 3.75      | 0.81         | 82              |
| 11    | 40                       | 4                                   | Et <sub>3</sub> N        | 0.78         | 30(rt) | 0.39      | 0.39         | 50              |
| 12    | 40                       | 4                                   | Et <sub>3</sub> N        | 0.78         | 30(rt) | 0.49      | 0.55         | 47              |

Note: The reaction time is 11 h; The pK<sub>a</sub> of the base is : DETA (18.29 in AN), DBU (23.9 in AN), and Et<sub>3</sub>N (17.61 in AN)

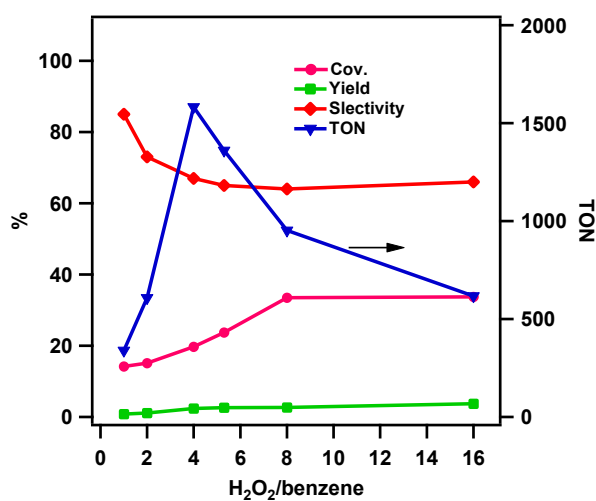

**Figure S1.** The effect of different ratio of H<sub>2</sub>O<sub>2</sub>/benzene on the oxidation of benzene to phenol catalyzed by catalyst **1** (0.44  $\mu\text{mol}$ ) under 45°C at 12 h.

**Table S2.** Different amounts of Et<sub>3</sub>N for hydroxylation of benzene.

| Entry          | Et <sub>3</sub> N <sup>a</sup> | Conv. (%) | Yield (%) | Selectivity (%)  |
|----------------|--------------------------------|-----------|-----------|------------------|
| 1              | -                              | 36.8      | 3.1       | 81.5             |
| 2              | 0.17mol%                       | 41.9      | 3.2       | 89.2             |
| 3              | 17mol%                         | 37.8      | 3.2       | 100 <sup>b</sup> |
| 4 <sup>c</sup> | 0.17mol%                       | 21        | 4.7       | 86.0             |
| 5 <sup>c</sup> | 0.017mol%                      | 30.9      | 5.2       | 88.7             |

Condition: 0.44 μmol catalyst **1**, 11 mmol benzene, 44 mmol H<sub>2</sub>O<sub>2</sub> (30%), 6.3 mL CH<sub>3</sub>CN, 45°C, 24 h. <sup>a</sup> As compared with benzene. <sup>b</sup> The selectivity obtained after 44h reaction. <sup>c</sup> The reaction is done in a sealed tube.

**Table S3.** Different kinds of base for hydroxylation of benzene.

| Entry | additive <sup>a</sup> | additive                    | pKa(MeCN) | Yield% | Selectivity% |
|-------|-----------------------|-----------------------------|-----------|--------|--------------|
| 2     | 0.36mol%              | Et <sub>2</sub> NH          | 18.75     | 4.7    | 85.9         |
| 3     | 0.29mol%              | <i>i</i> -PrNH <sub>2</sub> | 17.96     | 4.2    | 82.9         |
| 4     | 0.26mol%              | NH <sub>3</sub>             | 16.46     | 4.9    | 86.2         |
| 5     | 0.017mol%             | morpholine                  | 16.61     | 5.6    | 88.5         |
| 6     | 0.17mol%              | DMAP                        | 17.95     | 4.3    | 91.2         |
| 7     | 0.18mol%              | L-Ascorbic Acid Sodium      | -         | 3.8    | 86.5         |
| 8     | 2.5mol%               | BaCO <sub>3</sub>           | -         | 5.05   | 83.3         |

Condition: 0.44 μmol catalyst, 11 mmol benzene, 44 mmol H<sub>2</sub>O<sub>2</sub> (30%), 6.3mL CH<sub>3</sub>CN, 45°C, 21 - 24 h. <sup>a</sup>As compared with benzene.

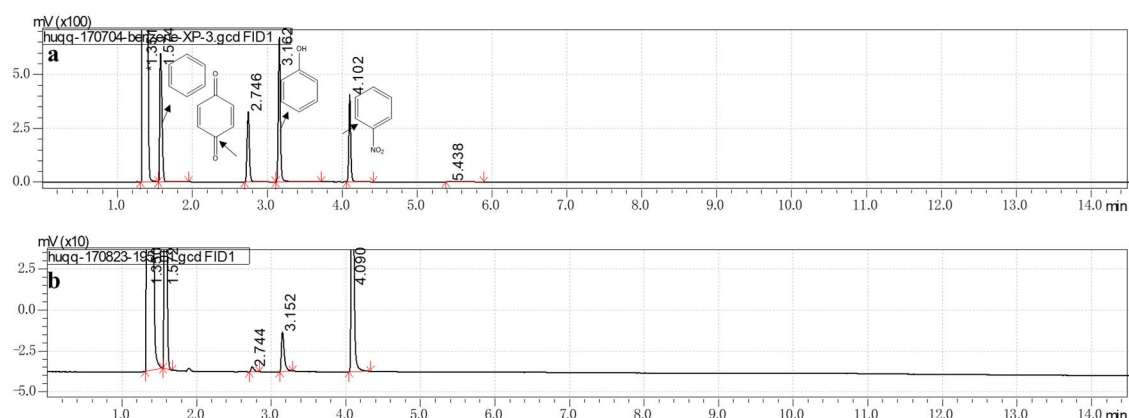

**Figure S2.** Gas chromatographs of the standard samples (a) and the reaction mixture of benzene oxidation (b). Reaction condition: catalyst **1** (0.48 mg, 0.44 μmol), benzene (860 mg, 11 mmol), base (Et<sub>3</sub>N, 0.5 mg, 5 μmol), 30% H<sub>2</sub>O<sub>2</sub> (4.5 mL, 44 mmol), 6.3 mL CH<sub>3</sub>CN, 45 °C, 23 h.

**Table S4.** Comparison of catalytic activity of various catalysts for oxidation of benzene with H<sub>2</sub>O<sub>2</sub>.

| Entry          | compound                                                                            | Yield (%) | TON   | Selectivity (%) | Time (h) | Temp. (°C) | C/S/O <sup>a</sup> | Ref.      |
|----------------|-------------------------------------------------------------------------------------|-----------|-------|-----------------|----------|------------|--------------------|-----------|
| 1 <sup>a</sup> | 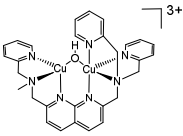   | 6.7       | 2100  | 92              | 24       | 65         | 1/25000/100000     | This work |
| 2 <sup>b</sup> |    | 6.1       | 14000 | 97              | 29       | 65         | 1/220000/8800000   | This work |
| 3              |    | 7.5       | 749   | 99              | 216      | 60         | 1/10000/50000      | Ref. 3    |
| 4              |    | 11.7      | 37    | 28.1            | 4        | 80         | 1/3333/5000        | Ref. 4    |
| 5              |  | -         | -     | 92              | 2        | 80         | 1/200/300          | Ref. 5    |
| 6              |  | 5.6       | -     | 94              | 1        | 25         | 1/100/50           | Ref. 6    |
| 7              |  | 20        | 6250  | 93.2            | 40       | 50         | 1/30000/120000     | Ref. 7    |
| 8              |  | 0.4       | 11.8  | -               | 2        | 20         | 1/3000/200         | Ref. 8    |
| 9              |  | 26        | -     | 82              | 1.5      | 25         | 1/100/250          | Ref. 9    |
| 10             |  | 64        | 89    | 98              | 3        | 50         | 1/100/250          | Ref. 10   |

|    |  |      |     |    |    |    |              |         |
|----|--|------|-----|----|----|----|--------------|---------|
| 11 |  | 29   | 586 | 98 | 5  | 60 | 1/2000/10000 | Ref. 11 |
| 12 |  | 38   | 760 | 98 | 5  | 60 | 1/2000/10000 | Ref. 12 |
| 13 |  | 41   | 820 | 97 | 5  | 60 | 1/2000/10000 | Ref. 13 |
| 14 |  | 22.4 |     | 95 | 24 | 25 | 1/50/500     | Ref. 14 |

<sup>a</sup> Condition: 0.44  $\mu\text{mol}$  catalyst **1**; <sup>b</sup> Condition: 0.05  $\mu\text{mol}$  catalyst **1**.

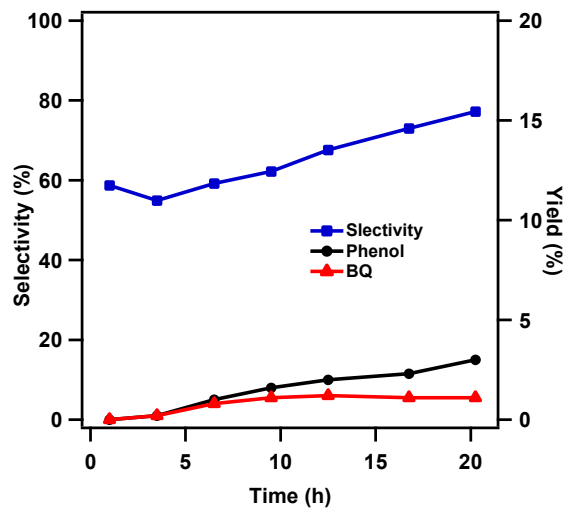

**Figure S3.** The catalytic selectivity and yield of the hydroxylation of benzene catalyzed by catalyst **1** at 45 °C. Condition: catalyst **1** (0.48 mg, 0.44  $\mu\text{mol}$ ), benzene (860 mg, 11 mmol), base ( $\text{Et}_3\text{N}$ , 0.5 mg, 5  $\mu\text{mol}$ ), 30%  $\text{H}_2\text{O}_2$  (4.5 mL, 44 mmol), 6.3 mL  $\text{CH}_3\text{CN}$ , 45 °C, 20 h.

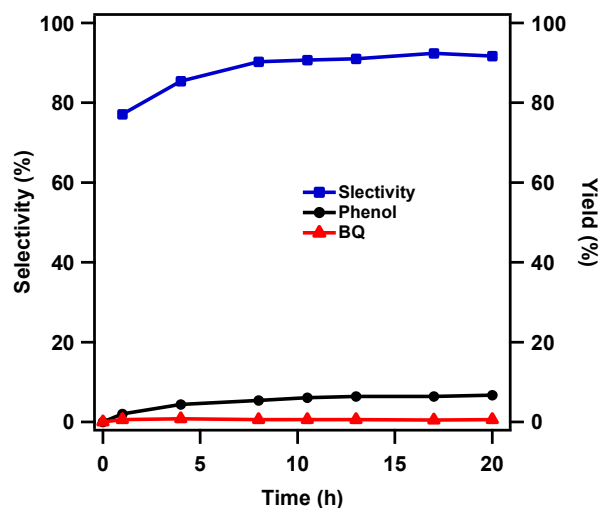

**Figure S4.** The catalytic selectivity and yield of the hydroxylation of benzene catalyzed by catalyst **1** at 65 °C. Condition: catalyst **1** (0.48 mg, 0.44  $\mu\text{mol}$ ), benzene (860 mg, 11 mmol), base ( $\text{Et}_3\text{N}$ , 0.5 mg, 5  $\mu\text{mol}$ ), 30%  $\text{H}_2\text{O}_2$  (4.5 mL, 44 mmol), 6.3 mL  $\text{CH}_3\text{CN}$ , 65 °C, 20 h.

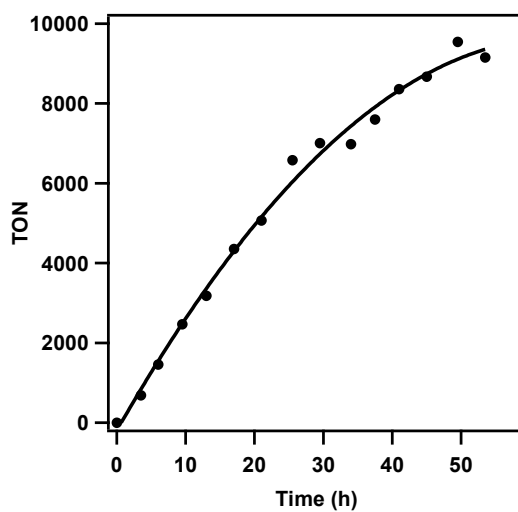

**Figure S5.** Time profile formation of phenol in the hydroxylation of benzene, catalyzed by catalyst **1** (0.05  $\mu\text{mol}$ ) 11 mmol benzene, 44 mmol 30%  $\text{H}_2\text{O}_2$ , 5  $\mu\text{mol}$   $\text{Et}_3\text{N}$  in 6.3 mL  $\text{CH}_3\text{CN}$ , 45°C.

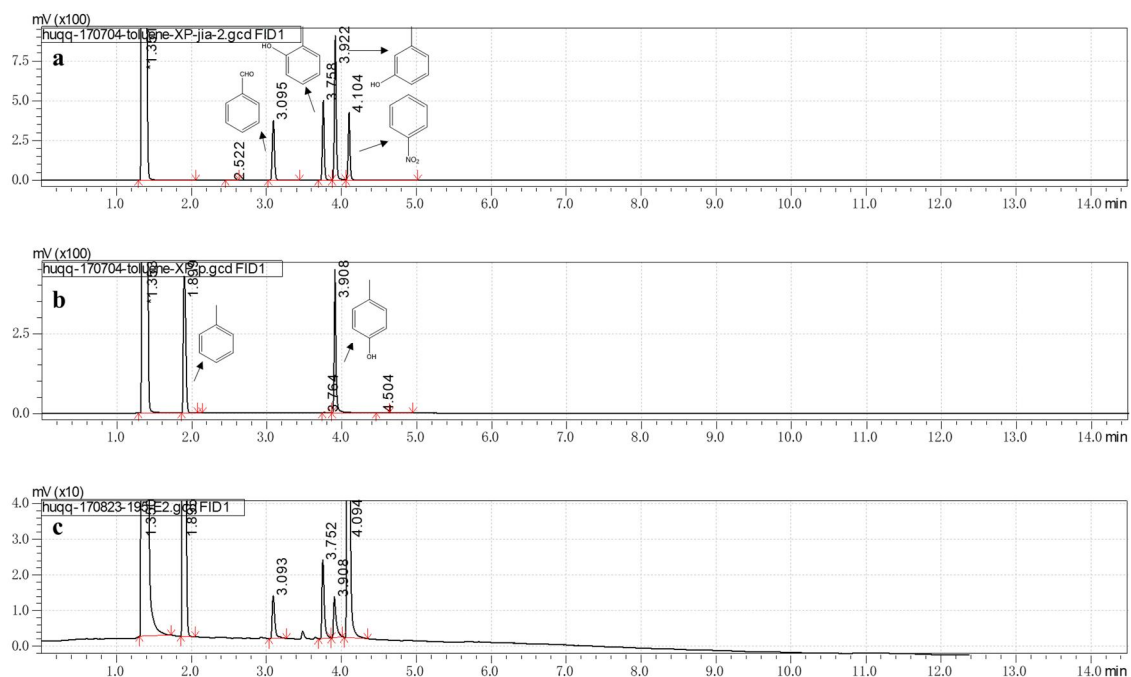

**Figure S6.** Gas chromatograms of the standard samples (a, b) and the reaction mixture of toluene oxidation (c). Reaction condition: catalyst **1** (0.48 mg, 0.44  $\mu\text{mol}$ ), toluene (780 mg, 8.5 mmol), base ( $\text{Et}_3\text{N}$ , 0.5 mg, 5  $\mu\text{mol}$ ), 30%  $\text{H}_2\text{O}_2$  (4.5 mL, 44 mmol), 6.3 mL  $\text{CH}_3\text{CN}$ , 45  $^\circ\text{C}$ , 23 h.

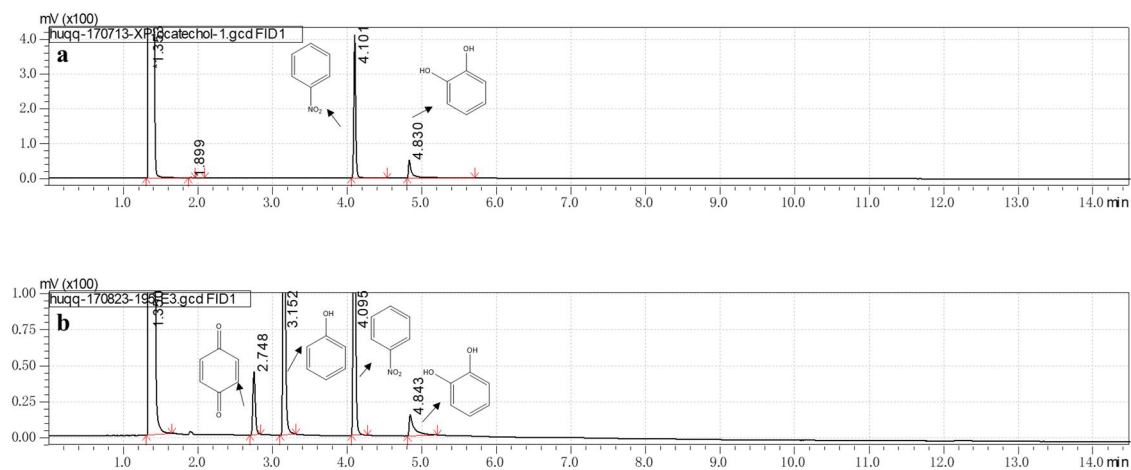

**Figure S7.** Gas chromatograms of the standard samples (a) and the reaction mixture of phenol oxidation (b). Reaction condition: catalyst **1** (0.48 mg, 0.44  $\mu\text{mol}$ ), phenol (770 mg, 8.2 mmol), base ( $\text{Et}_3\text{N}$ , 0.5 mg, 5  $\mu\text{mol}$ ), 30%  $\text{H}_2\text{O}_2$  (4.5 mL, 44 mmol), 6.3 mL  $\text{CH}_3\text{CN}$ , 45  $^\circ\text{C}$ , 23 h.



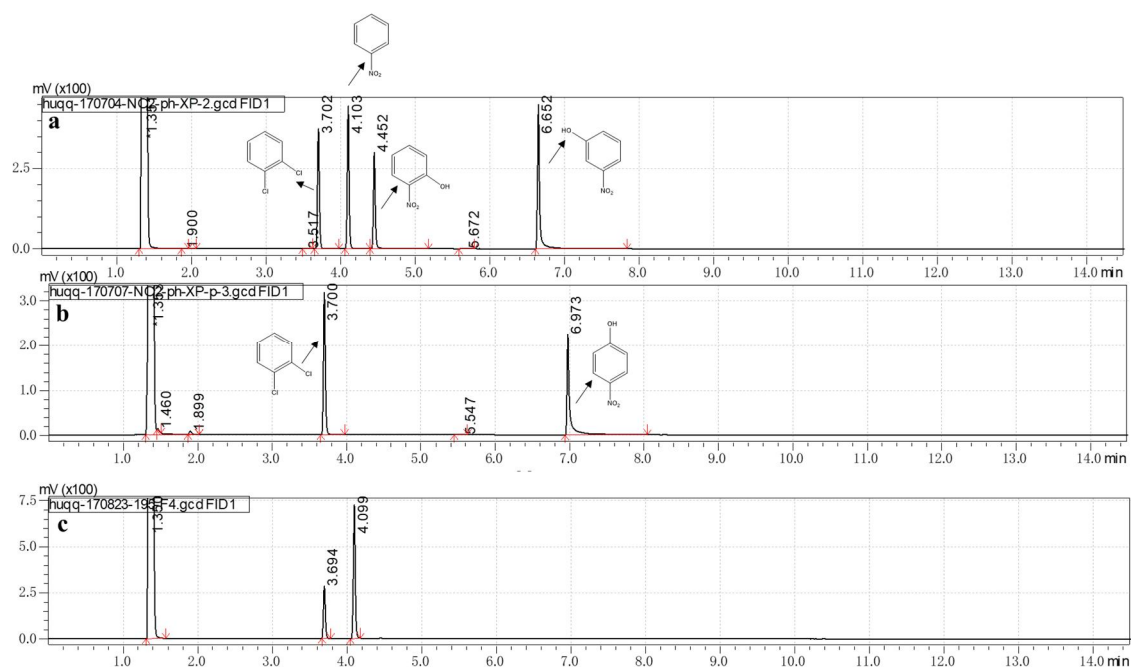

**Figure S8.** Gas chromatographs of the standard samples (a, b) and the reaction mixture of nitrobenzene oxidation (c). Reaction condition: catalyst **1** (0.48 mg, 0.44  $\mu\text{mol}$ ), nitrobenzene (1010 mg, 8.2 mmol), base ( $\text{Et}_3\text{N}$ , 0.5 mg, 5  $\mu\text{mol}$ ), 30%  $\text{H}_2\text{O}_2$  (4.5 mL, 44 mmol), 6.3 mL  $\text{CH}_3\text{CN}$ , 45  $^\circ\text{C}$ , 23 h.

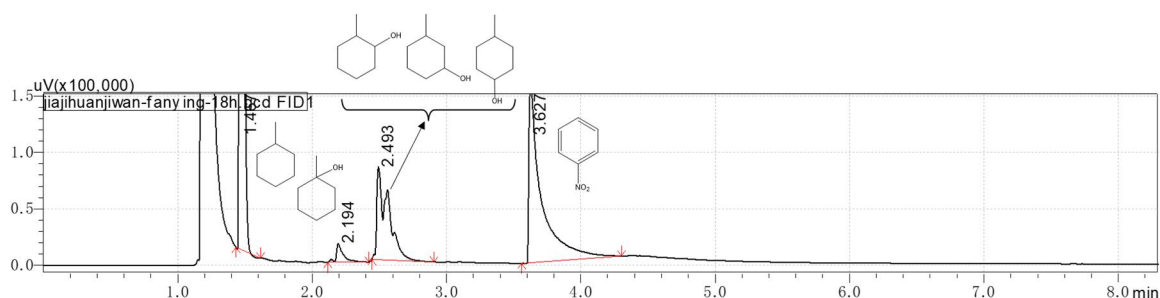

**Figure S9.** Gas chromatographs of the reaction mixture of methylcyclohexane oxidation. Reaction condition: catalyst **1** (0.48 mg, 0.44  $\mu\text{mol}$ ), methylcyclohexane (1142 mg, 10 mmol), base ( $\text{Et}_3\text{N}$ , 0.5 mg, 5  $\mu\text{mol}$ ), 30%  $\text{H}_2\text{O}_2$  (4.5 mL, 44 mmol), 6 mL  $\text{CH}_3\text{CN}$ , 65  $^\circ\text{C}$ , 18 h.

Note:  $S_{3\text{-OH}}$  (peak 2.194):  $S_{2\text{-OH}}$  (peak 2.493) = 0.455: 6.624; this result means that the product selectivity of the hydroxylation of methylcyclohexane is about 1 (tertiary alcohol) : 15 (secondary alcohol).

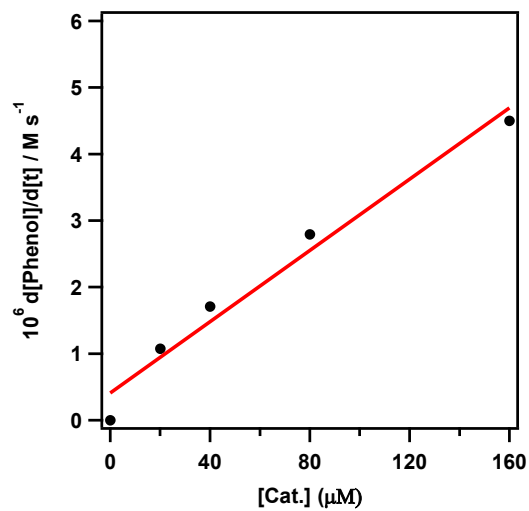

**Figure S10.** Dependence of the initial rate of phenol production by oxidation of benzene catalyzed by different concentration of catalyst **1** under 45°C.

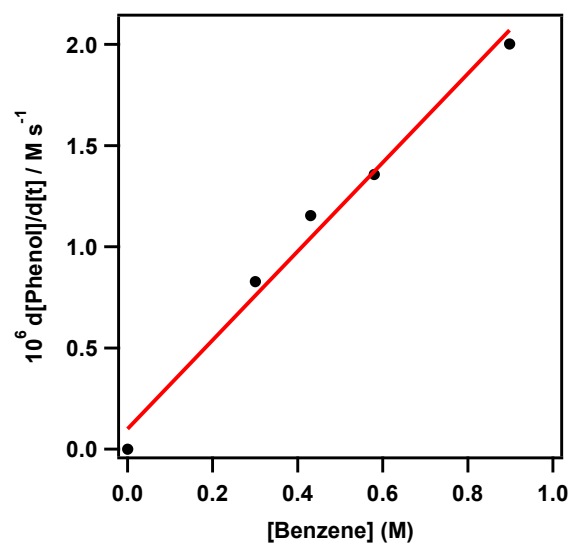

**Figure S11.** Dependence of the initial rate of phenol production by oxidation of benzene catalyzed by catalyst **1** with different concentration of benzene under 45°C.

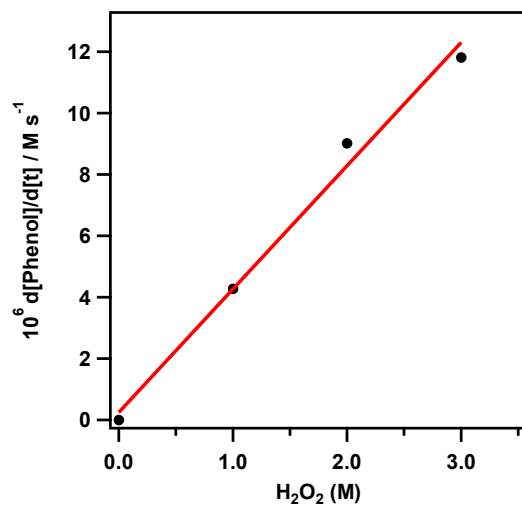

**Figure S12.** Dependence of the initial rate of phenol production by oxidation of benzene catalyzed by catalyst **1** with different concentration of the oxidant (H<sub>2</sub>O<sub>2</sub>) under 45°C.

## DFT calculations

### Computational Details

All density functional calculations in the present study were performed by using the B3LYP<sup>15</sup>-D3 functional (with D3BJ dispersion),<sup>16,17</sup> as implemented in the Gaussian 16 program package.<sup>18</sup> For the geometry optimizations, the SDD pseudopotential<sup>19</sup> and its corresponding basis sets were used for Cu, and the 6-31G(d,p) basis sets<sup>20,21</sup> were used for the C, N, O, and H elements. Analytic frequency calculations were carried out at the same level of theory as the geometry optimization to obtain the Gibbs free energy corrections and to identify all the stationary points as minima (no imaginary frequency) or transition states (one imaginary frequency). To obtain more accurate energies, single-point calculations using these optimized geometries were done employing a larger basis set, where all elements, except Cu (ECP10MDF pseudopotentials),<sup>22</sup> were described by 6-311+G(2df,2pd). Solvation effects from the acetonitrile solvent were calculated using the SMD continuum solvation model<sup>23</sup> with the larger basis set at the B3LYP-D3(BJ) levels. For pK<sub>a</sub>s calculations, the Gibbs free energy of a proton in acetonitrile is -264.7 kcal/mol, which is composed of the experimental solvation free energy of a proton in acetonitrile (-258.4 kcal/mol)<sup>24,25</sup> and the Gibbs free energy correction (-6.3 kcal/mol)<sup>25</sup> resulting from the translation entropy of a proton in the gas phase.

The concentration correction of +1.9 kcal/mol at room temperature (derived from the free-energy change of 1 mol of an ideal gas from 1 atm (24.5 L/mol, 298.15 K) to 1 M) was added for all species. Unless otherwise specified, the B3LYP-D3(BJ) energies are reported, including Gibbs free energy corrections and D3(BJ) dispersion from B3LYP. The 3D images of the computed structures were prepared using CYLView.<sup>26</sup>

*Ab initio* molecular dynamics (AIMD) calculations in the gas phase were conducted using the Quickstep Module of the CP2K package<sup>27,28</sup> to demonstrate that the metastable intermediate **Int4'** generated via **TS1** can isomerize to the intermediate **Int4** without any applied potential and rapidly. The DFT-optimized structure of **Int4'** was used as the starting configuration for the AIMD simulation. The PBE functional<sup>29</sup> with D3 dispersion corrections<sup>30</sup> was used. The motion of the atoms was generated using molecular dynamics, using a timestep of 0.5 fs. The simulations used a periodic cubic box ( $L = 16.12 \text{ \AA}$ ). All elements were described with the DZVP-MOLOPT-SR-GTH basis set, using the Goedecker-Teter-Hutter (GTH) pseudopotentials.<sup>31</sup> The plane wave cutoff was 280 Ry for the calculations. To avoid the nonergodic and glassy behavior,<sup>32</sup> the temperature was set slightly above room temperature ( $T = 300 \text{ K}$ ) and controlled using a CSV thermostat.<sup>33</sup> The simulations were carried out for 8.5 ps, in which all the atoms were relaxed, and the length of the O2-Cu2 bond was calculated as the average of the last five ps of the trajectory.

**Table S5.** Optimized structures of complexes **1** ( $[\text{Cu}^{\text{II}}_2(\text{TPMAN})(\mu\text{-OH})(\text{H}_2\text{O})]^{3+}$ ) and **Int1**. Distances are shown in Å in black, and Mulliken spin populations on selected atoms are shown in red. For clarity, unimportant hydrogen atoms are not shown.

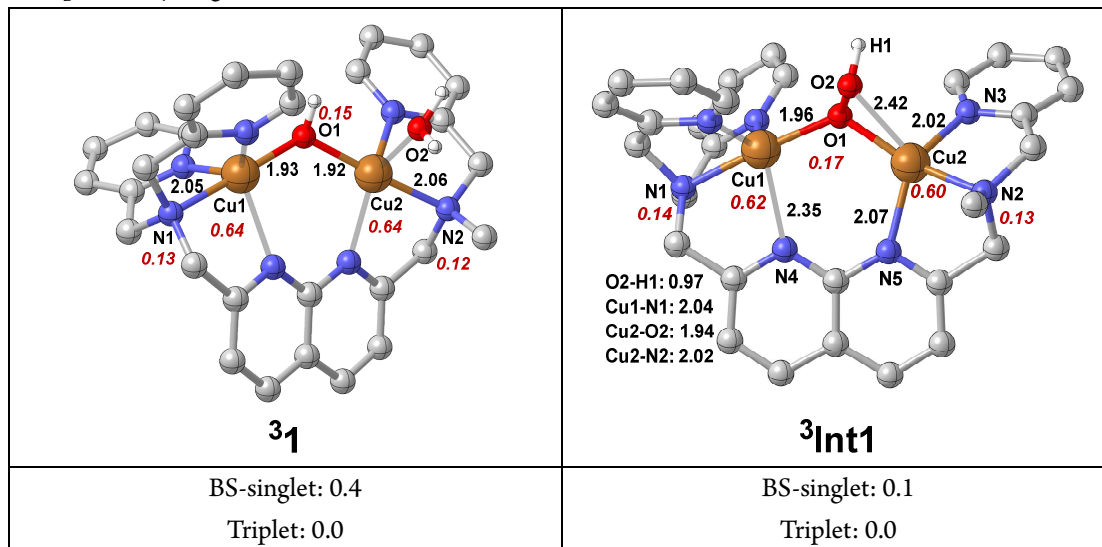

**Table S6.** Optimized structures of **Int2**, its possible isomers (complexes **Int2A** and **Int2B**), and **Int3**. Distances are shown in Å in black, and Mulliken spin populations on selected atoms are shown in red. For clarity, unimportant hydrogen atoms are not shown.

|                                                                                                                                                                                         |                                                                                                                                                             |
|-----------------------------------------------------------------------------------------------------------------------------------------------------------------------------------------|-------------------------------------------------------------------------------------------------------------------------------------------------------------|
| <p>           Cu1-N1: 2.12<br/>           O1-Cu2: 2.02<br/>           O2-Cu2: 1.94<br/>           Cu2-N2: 2.03         </p> <p style="text-align: center;"><b><sup>3</sup>Int2</b></p>  | <p>           Cu2-O2: 1.78<br/>           Cu2-N2: 2.03<br/>           Cu2-N3: 1.95         </p> <p style="text-align: center;"><b><sup>3</sup>Int2A</b></p> |
| <p>BS-singlet: 1.6<br/>Triplet: 0.0</p>                                                                                                                                                 | <p>BS-singlet: +27.7 kcal/mol relative to complex <b><sup>3</sup>Int2</b><br/>Triplet: +26.8 kcal/mol relative to complex <b><sup>3</sup>Int2</b></p>       |
| <p>           Cu1-O1: 1.98<br/>           Cu1-O2: 1.97<br/>           Cu2-O1: 1.92<br/>           Cu2-O2: 1.92         </p> <p style="text-align: center;"><b><sup>3</sup>Int2B</b></p> | <p>           Cu1-N1: 2.10<br/>           Cu2-N3: 2.00         </p> <p style="text-align: center;"><b><sup>2</sup>Int3</b></p>                              |
| <p>BS-singlet: +36.0 kcal/mol relative to complex <b><sup>3</sup>Int2</b><br/>Triplet: +32.7 kcal/mol relative to complex <b><sup>3</sup>Int2</b></p>                                   | <p>Doublet: 0.0<br/>Quartet: 19.0</p>                                                                                                                       |

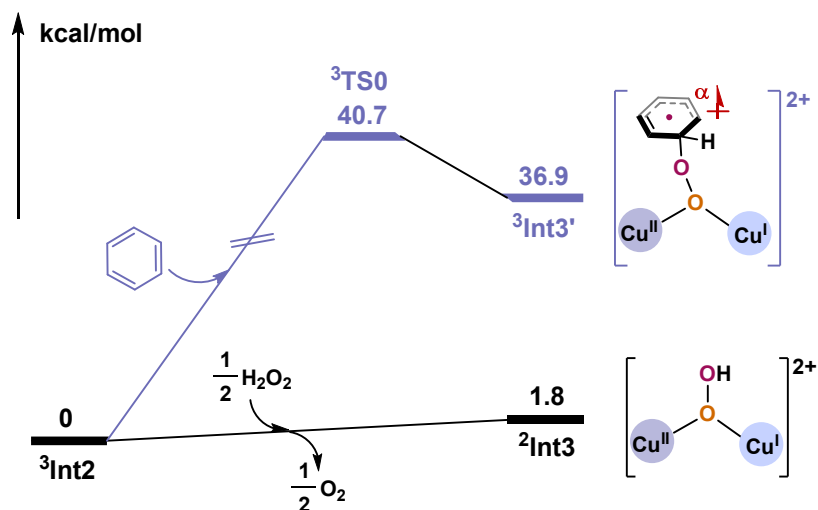

**Figure S13.** The Gibbs free energy diagram for benzene and H<sub>2</sub>O<sub>2</sub> react with Int2.

**Table S7.** Optimized structures of TS0 and Int3'. Distances are shown in Å in black, Mulliken spin populations on selected atoms are shown in red, and the imaginary frequency (in cm<sup>-1</sup>) for TS0 is also shown. For clarity, unimportant hydrogen atoms are not shown.

|                                         |                                         |
|-----------------------------------------|-----------------------------------------|
| <p><b><sup>3</sup>TS0</b></p>           | <p><b><sup>3</sup>Int3'</b></p>         |
| <p>BS-singlet: 1.1<br/>Triplet: 0.0</p> | <p>BS-singlet: 0.7<br/>Triplet: 0.0</p> |

**Table S8.** Optimized structures of **TS1**, **Int4'**, and **Int4**. Distances are shown in Å in black, Mulliken spin populations on selected atoms are shown in red, and the imaginary frequency (in  $\text{cm}^{-1}$ ) for **TS1** is also shown. For clarity, unimportant hydrogen atoms are not shown.

|                                                                                                                                                                                               |                                                                                                                                                                    |
|-----------------------------------------------------------------------------------------------------------------------------------------------------------------------------------------------|--------------------------------------------------------------------------------------------------------------------------------------------------------------------|
| 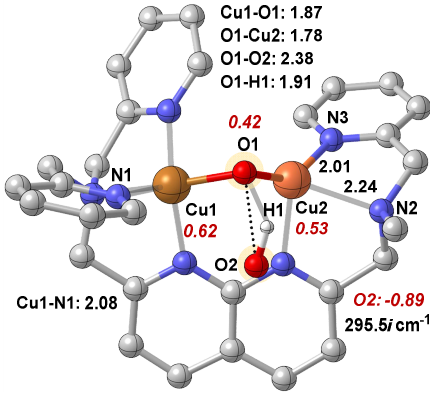 <p> <b><math>^2\text{TS1}</math></b><br/>           Doublet: 0.0         </p>                               |  <p> <b><math>^2\text{Int4}'</math></b><br/>           Doublet: 0.0         </p> |
|  <p> <b><math>^2\text{Int4}</math></b><br/>           Doublet: 0.0<br/>           Quartet: 4.8         </p> |                                                                                                                                                                    |



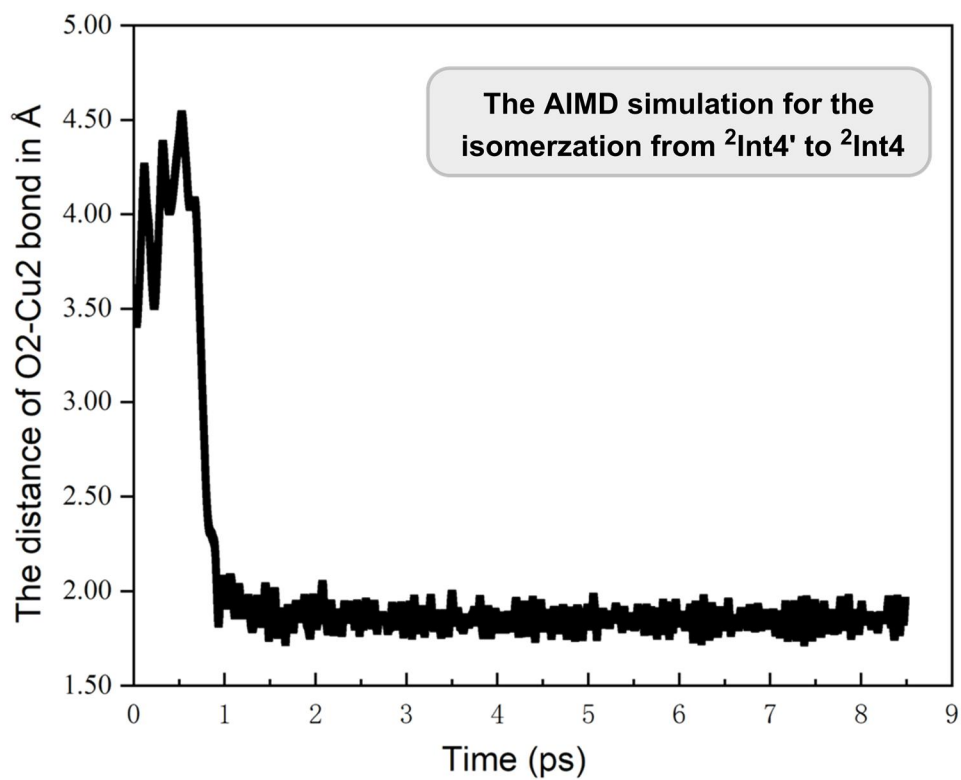

**Figure S14.** Collective variables of O2-Cu2 distance (in Å) as a function of simulation time (in ps)

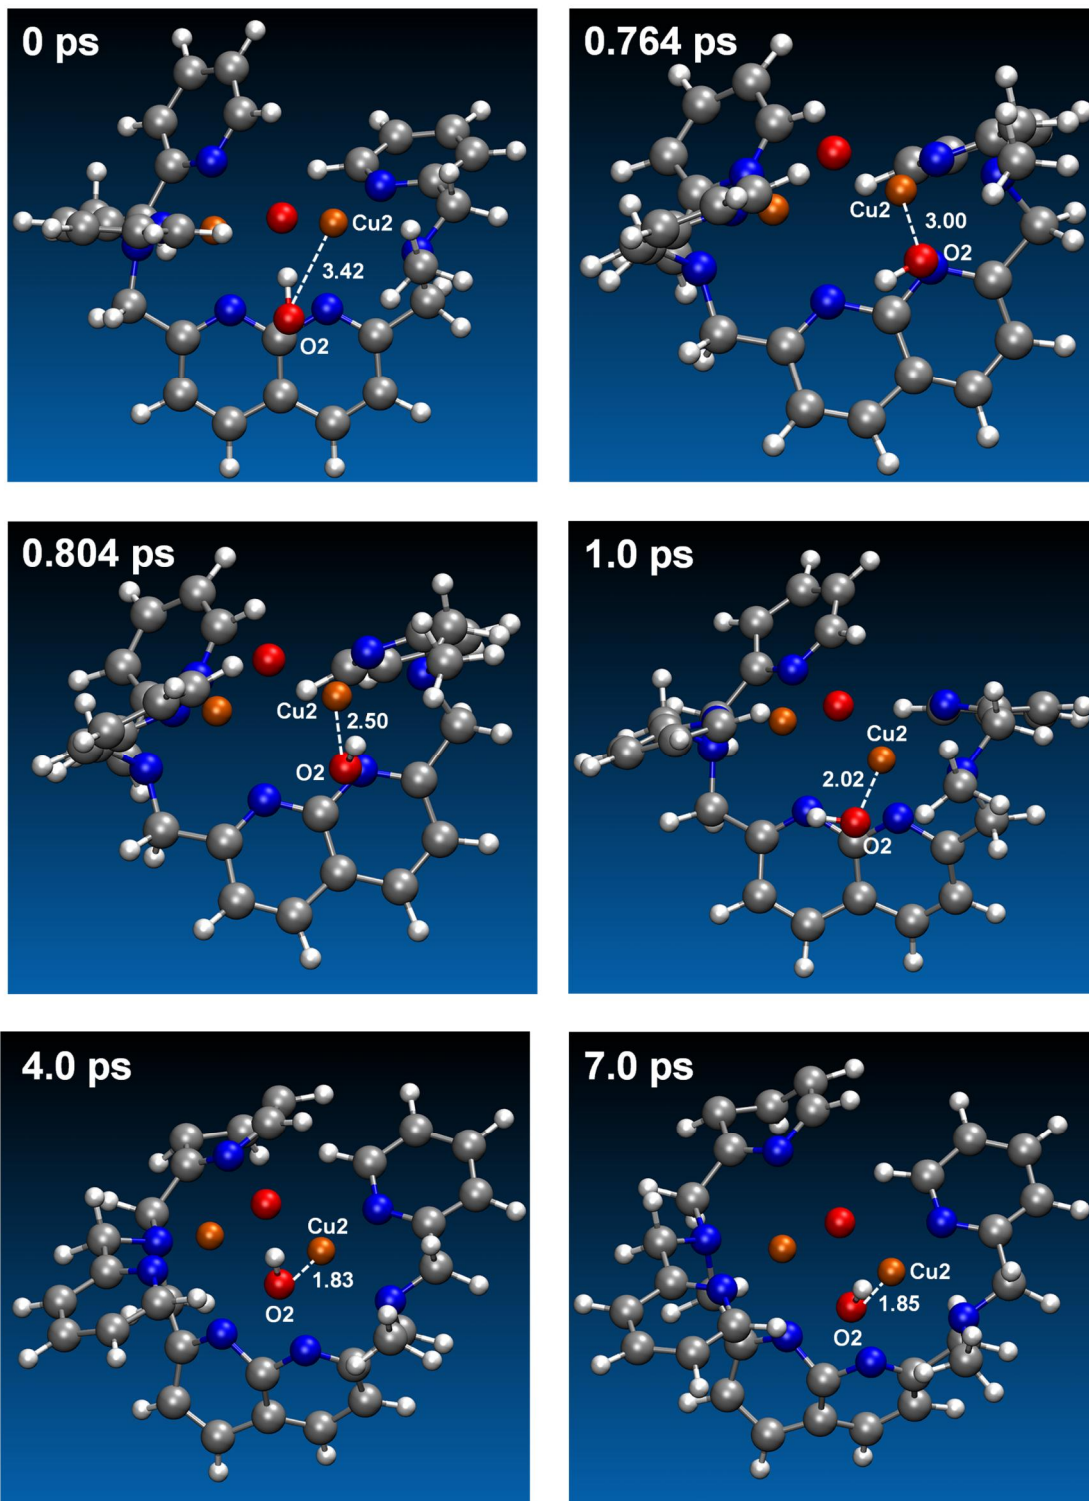

**Figure S15.** Snapshots for the isomerization process of **Int4'** to **Int4** in the gas phase, the distance of O2-Cu2 is shown in Å. The average distance of the O2-Cu2 bond is 1.85 Å.

**Table S9.** Optimized structures of **TS1'** and **Int4''**. Distances are shown in Å in black, Mulliken spin populations on selected atoms are shown in red, and the imaginary frequency (in  $\text{cm}^{-1}$ ) for transition state **TS1'** is also shown. For clarity, unimportant hydrogen atoms are not shown.

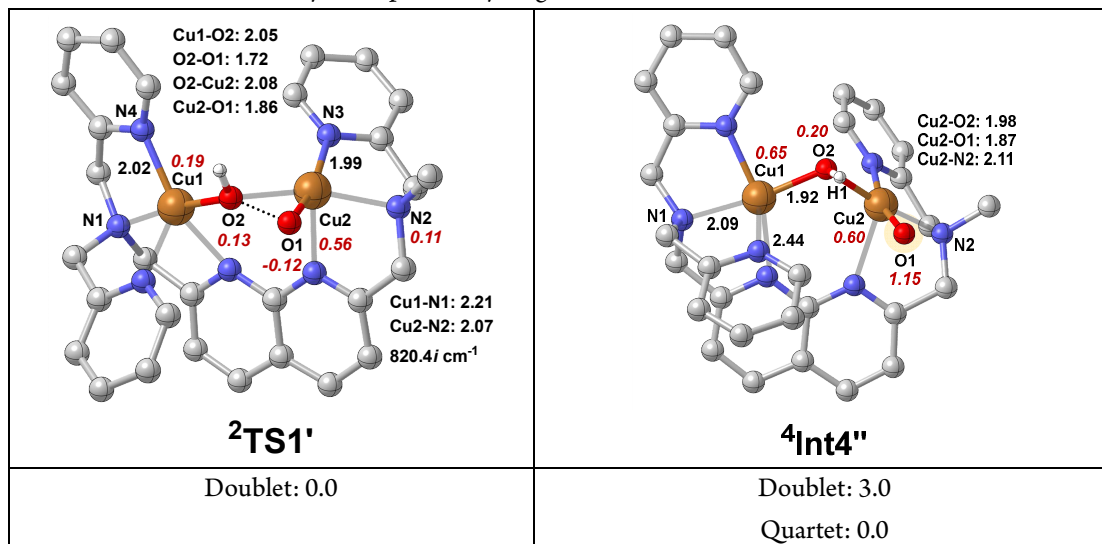

**Table S10.** Optimized structures of **TS2**, **Int5**, **TS3**, **Int6**, benzene and phenol. Distances are shown in Å in black, Mulliken spin populations on selected atoms are shown in red, and the imaginary frequencies (in  $\text{cm}^{-1}$ ) for transition states are also shown. For clarity, unimportant hydrogen atoms are not shown.

|                                                                                     |                                                                                      |
|-------------------------------------------------------------------------------------|--------------------------------------------------------------------------------------|
|                                                                                     |                                                                                      |
| Doublet: 0.1<br>Quartet: 0.0                                                        | Doublet: 0.3<br>Quartet: 0.0                                                         |
|                                                                                     |                                                                                      |
| Doublet: 0.0                                                                        | Doublet: 0.0<br>Quartet: 13.9                                                        |
| 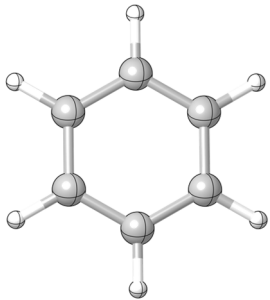 |  |
| benzene                                                                             | phenol                                                                               |

**Table S11.** The calculated barriers for different substrates react with the catalytic active species **Int4**.

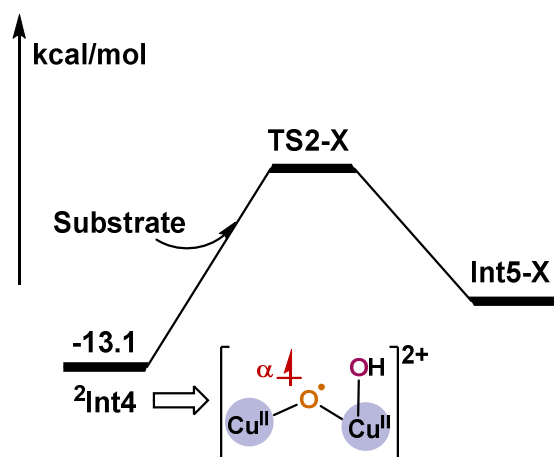

| Substrate    | The calculated barrier (TS2-X) relative to Int4 in kcal/mol | Structure for Int5-X |
|--------------|-------------------------------------------------------------|----------------------|
| Benzene      | +14.0                                                       |                      |
| Nitrobenzene | +16.7                                                       |                      |
|              | +16.9                                                       |                      |
|              | +15.4                                                       |                      |

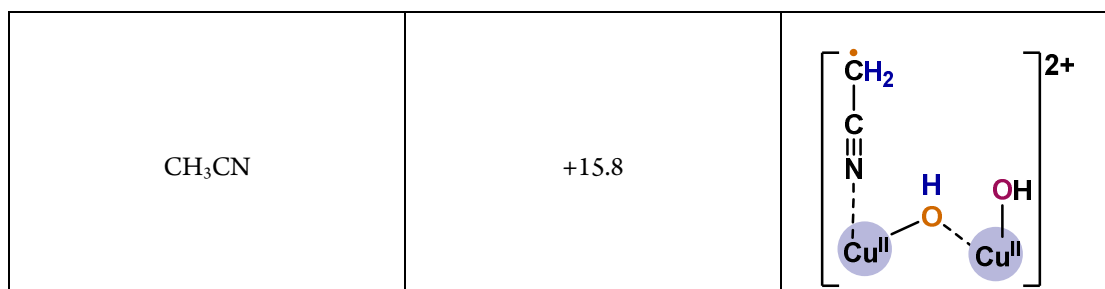

**Table S12.** Optimized structures of **TS2-*o*-nitrobenzene**, **TS2-*m*-nitrobenzene**, **TS2-*p*-nitrobenzene**, **TS2-CH<sub>3</sub>CN**, nitrobenzene and CH<sub>3</sub>CN. Distances are shown in Å in black, Mulliken spin populations on selected atoms are shown in red, and the imaginary frequencies (in cm<sup>-1</sup>) for transition states are also shown. For clarity, unimportant hydrogen atoms are not shown.

|                                                                                                                                        |                                                                                                                                        |
|----------------------------------------------------------------------------------------------------------------------------------------|----------------------------------------------------------------------------------------------------------------------------------------|
| 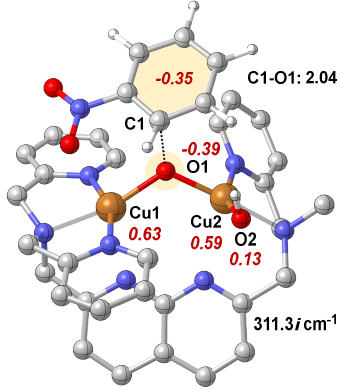 <p><b><sup>2</sup>TS2-<i>o</i>-nitrobenzene</b></p>  |  <p><b><sup>4</sup>TS2-<i>m</i>-nitrobenzene</b></p> |
| <p>Doublet: 0.0</p> <p>Quartet: 1.0</p>                                                                                                | <p>Doublet: 0.8</p> <p>Quartet: 0.0</p>                                                                                                |
|  <p><b><sup>4</sup>TS2-<i>p</i>-nitrobenzene</b></p> |  <p><b><sup>2</sup>TS2-CH<sub>3</sub>CN</b></p>     |
| <p>Doublet: 0.2</p> <p>Quartet: 0.0</p>                                                                                                | <p>Doublet: 0.0</p> <p>Quartet: 0.8</p>                                                                                                |
|                                                     |                                                    |
| <p>nitrobenzene</p>                                                                                                                    | <p>CH<sub>3</sub>CN</p>                                                                                                                |

**Table S13.** Calculated energies in Hartree for all ground-state stationary points

| Stationary point                 | Opt (Hartree) | Gibbs (Hartree) | Large basis set in SMD<br>(Hartree) |
|----------------------------------|---------------|-----------------|-------------------------------------|
| H <sub>2</sub> O <sub>2</sub>    | -151.54151    | 0.00473         | -151.62397                          |
| H <sub>2</sub> O                 | -76.41873     | 0.00373         | -76.47195                           |
| Et <sub>3</sub> N                | -292.46075    | 0.17234         | -292.55807                          |
| Et <sub>3</sub> NH <sup>+</sup>  | -292.20220    | 0.17198         | -292.37820                          |
| O <sub>2</sub>                   | -150.31706    | -0.01620        | -150.38264                          |
| Benzene                          | -232.27201    | 0.07325         | -232.35493                          |
| Phenol                           | -307.49338    | 0.07596         | -307.61340                          |
| <b>1</b>                         | -2052.32114   | 0.51610         | -2053.40028                         |
| <b>Int1</b>                      | -2050.99335   | 0.49660         | -2052.07262                         |
| <b>Int2</b>                      | -2050.76731   | 0.48292         | -2051.61167                         |
| <b>Int2A</b>                     | -2050.71784   | 0.48379         | -2051.56990                         |
| <b>Int2B</b>                     | -2050.72215   | 0.48175         | -2051.55844                         |
| <b>Int3</b>                      | -2051.39018   | 0.49365         | -2052.22815                         |
| <b>TS0</b>                       | -2283.01521   | 0.57349         | -2283.91607                         |
| <b>Int3'</b>                     | -2283.02332   | 0.57620         | -2283.92475                         |
| <b>TS1</b>                       | -2051.36009   | 0.49069         | -2052.21313                         |
| <b>Int4'</b>                     | -2051.36330   | 0.49115         | -2052.21742                         |
| <b>Int4</b>                      | -2051.40569   | 0.49754         | -2052.25591                         |
| <b>TS2</b>                       | -2283.68840   | 0.58866         | -2284.60325                         |
| <b>Int5</b>                      | -2283.70535   | 0.59123         | -2284.62039                         |
| <b>TS3</b>                       | -2283.69539   | 0.58878         | -2284.60740                         |
| <b>Int6</b>                      | -2283.77658   | 0.58629         | -2284.68413                         |
| <b>TS1'</b>                      | -2051.34048   | 0.49133         | -2052.18850                         |
| <b>Int4''</b>                    | -2051.39421   | 0.49494         | -2052.24466                         |
| <b>TS2-<i>o</i>-nitrobenzene</b> | -2488.20161   | 0.59035         | -2489.18780                         |
| <b>TS2-<i>m</i>-nitrobenzene</b> | -2488.19338   | 0.59001         | -2489.18723                         |
| <b>TS2-<i>p</i>-nitrobenzene</b> | -2488.19338   | 0.59001         | -2489.18723                         |
| <b>TS2-CH<sub>3</sub>CN</b>      | -2184.15381   | 0.53038         | -2185.05638                         |
| nitrobenzene                     | -436.77464    | 0.07179         | -436.94061                          |
| CH <sub>3</sub> CN               | -132.76040    | 0.02143         | -132.81994                          |



## References

1. E. Weber and H. J. Köhler, *J. Prakt. Chem.*, 1995, **337**, 451-455.
2. Q.-Q. Hu, X.-J. Su and M.-T. Zhang, *Inorg. Chem.*, 2018, **57**, 10481-10484.
3. Y. Morimoto, S. Bunno, N. Fujieda, H. Sugimoto and S. Itoh, *J. Am. Chem. Soc.*, 2015, **137**, 5867-5870.
4. L. Wu, W. Zhong, B. Xu, Z. Wei and X. Liu, *Dalton Trans.*, 2015, **44**, 8013-8020.
5. A. Conde, M. Mar Díaz-Requejo and P. J. Pérez, *Chem. Commun.*, 2011, **47**, 8154-8156.
6. A. Raba, M. Cokoja, W. A. Herrmann and F. E. Kühn, *Chem. Commun.*, 2014, **50**, 11454-11457.
7. T. Tsuji, A. A. Zaoputra, Y. Hitomi, K. Mieda, T. Ogura, Y. Shiota, K. Yoshizawa, H. Sato and M. Kodera, *Angew. Chem. Int. Ed.*, 2017, **56**, 7779-7782.
8. A. Thibon, J.-F. Bartoli, R. Guillot, J. Sainton, M. Martinho, D. Mansuy and F. Banse, *J. Mol. Cat. A*, 2008, **287**, 115-120.
9. G. Capocasa, G. Olivo, A. Barbieri, O. Lanzalunga and S. Di Stefano, *Catal. Sci. Technol.*, 2017, **7**, 5677-5686.
10. L. Carneiro and A. R. Silva, *Catal. Sci. Technol.*, 2016, **6**, 8166-8176.
11. S. Kumari, S. Muthuramalingam, A. K. Dhara, U. P. Singh, R. Mayilmurugan and K. Ghosh, *Dalton Trans.*, 2020, **49**, 13829.
12. S. Muthuramalingam, K. Anandababu, M. Velusamy and R. Mayilmurugan, *Inorg. Chem.*, 2020, **59**, 5918.
13. S. Muthuramalingam, K. Anandababu, M. Velusamy and R. Mayilmurugan, *Catal. Sci. Technol.*, 2019, **9**, 5991.
14. Q. Huimin, X. Daqian, L. Jin and S. Wei, *Mol. Catal.*, 2022, **528**, 112441.
15. A. D. Becke, *J. Chem. Phys.* 1993, **98**, 5648– 5652.
16. S. Grimme, J. Antony, S. Ehrlich and H. Krieg, *J. Chem. Phys.*, 2010, **132**, 154104.
17. S. Grimme, S. Ehrlich and L. Goerigk, *J. Comput. Chem.*, 2011, **32**, 1456-1465.
18. Gaussian 16, Revision C.01, M. J. Frisch, G. W. Trucks, H. B. Schlegel, G. E. Scuseria, M. A. Robb, J. R. Cheeseman, G. Scalmani, V. Barone, G. A. Petersson, H. Nakatsuji, X. Li, M. Caricato, A. V. Marenich, J. Bloino, B. G. Janesko, R. Gomperts, B. Mennucci, H. P. Hratchian, J. V. Ortiz, A. F. Izmaylov, J. L. Sonnenberg, D. Williams-Young, F. Ding, F. Lipparini, F. Egidi, J. Goings, B. Peng, A. Petrone, T. Henderson, D. Ranasinghe, V. G. Zakrzewski, J. Gao, N. Rega, G. Zheng, W. Liang, M. Hada, M. Ehara, K. Toyota, R. Fukuda, J. Hasegawa, M. Ishida, T. Nakajima, Y. Honda, O. Kitao, H. Nakai, T. Vreven, K. Throssell, J. A. Montgomery, Jr., J. E. Peralta, F. Ogliaro, M. J. Bearpark, J. J. Heyd, E. N. Brothers, K. N. Kudin, V. N. Staroverov, T. A. Keith, R. Kobayashi, J. Normand, K. Raghavachari, A. P. Rendell, J. C. Burant, S. S. Iyengar, J. Tomasi, M. Cossi, J. M. Millam, M. Klene, C. Adamo, R. Cammi, J. W. Ochterski, R. L. Martin, K. Morokuma, O. Farkas, J. B. Foresman, and D. J. Fox, Gaussian, Inc., Wallingford CT, 2019.
19. D. Andrae, U. Häußermann, M. Dolg, H. Stoll, and H. Preuß, *Theor. Chim. Acta*, 1990, **77**, 123-141.
20. M. M. Francl, W. J. Pietro, W. J. Hehre, J. S. Binkley, M. S. Gordon, D. J. DeFrees and J. A. Pople, *J. Chem. Phys.*, 1982, **77**, 3654-3665.
21. G. A. Petersson, A. Bennett, T. G. Tensfeldt, M. A. Al-Laham, W. A. Shirley and J. Mantzaris, *J. Chem. Phys.*, 1988, **89**, 2193-2218.
22. D. Figgen, G. Rauhut, M. Dolg and H. Stoll, *Chem. Phys.*, 2005, **311**, 227-244.
23. A. V. Marenich, C. J. Cramer, and D. G. Truhlar, *J. Phys. Chem. B*, 2009, **113**, 6378-6396.
24. C. P. Kelly, C. J. Cramer and D. Truhlar, *J. Phys. Chem. B*, 2007, **111**, 408-422.

25. D. M. Camaioni and C. A. Schwerdtfeger, *J. Phys. Chem. A*, 2005, **109**, 10795-10797.
26. CYLview, 1.0b & Legault, C. Y. Université de Sherbrooke, 2009 (<http://www.cylview.org>)
27. CP2K developers group, CP2K Program Package, <https://www.cp2k.org/>
28. T. D. Kühne, M. Iannuzzi, M. D. Ben, V. V. Rybkin, P. Seewald, F. Stein, T. Laino, R. Z. Khaliullin, O. Schütt, F. Schiffmann, D. Golze, J. Wilhelm, S. Chulkov, M. H. Bani-Hashemian, V. Weber, U. Borštnik, M. Taillefumier, A. S. Jakobovits, A. Lazzaro, H. Pabst, T. Müller, R. Schade, M. Guidon, S. Andermatt, N. Holmberg, G. K. Schenter, A. Hehn, A. Bussy, F. Belleflamme, G. Tabacchi, A. Glöß, M. Lass, I. Bethune, C. J. Mundy, C. Plessl, M. Watkins, J. VandeVondele, M. Krack, and J. Hutter; *J. Chem. Phys.*, 2020; **152**, 194103.
29. J. P. Perdew, K. Burke, and M. Ernzerhof, *Phys. Rev. Lett.*, 1996, **77**, 3865-3868.
30. S. Grimme, J. Antony, S. Ehrlich, and H. Krieg, *J. Chem. Phys.*, 2010; **132**, 154104-154122.
31. J. VandeVondele and J. Hutter, *J. Chem. Phys.*, 2007, **127**, 14105.
32. J. VandeVondele, F. Mohamed, M. Krack, J. Hutter, M. Sprik, and M. Parrinello, *J. Chem. Phys.*, 2005; **122**, 014515.
33. G. Bussi, D. Donadio, and M. Parrinello, *J. Chem. Phys.*, 2007; **126**, 014101.

### Coordinates for the calculated structures

H<sub>2</sub>O<sub>2</sub>

(charge: 0, multiplicity: singlet, E = -151.54151 Hartree)

O 1.0515765432 0.8791886715 -0.0165543062

H 2.0148978291 0.9948882621 -0.0073816957

O 0.6342705452 2.2733460775 0.0288203249

H 0.1703957199 2.3345097582 -0.8212017821

H<sub>2</sub>O

(charge: 0, multiplicity: singlet, E = -76.41873 Hartree)

O 1.0514171441 0.9335360506 0.

H 2.0150788739 0.980156106 0.

H 0.7736862427 1.8574856734 0

Et<sub>3</sub>N

(charge: 0, multiplicity: singlet, E = -292.46075 Hartree)

N -0.9122777351 0.3981806274 0.0005787044

C -0.4852068291 -0.9930054792 0.1743926501

H -0.5400149253 -1.4879656259 -0.7995315986

H 0.5752825156 -1.0518101705 0.4882659303

C -0.4860312037 1.2439789481 1.1190363176

H -0.5431729293 0.648311913 2.0346992904

H 0.5750482906 1.5437942782 1.014825305

C -0.4839632936 0.9435320925 -1.2905726523

H -0.5404635878 2.0343900362 -1.2326985716

H 0.5772201611 0.7026306222 -1.496699289

C -1.3659390489 0.4776735271 -2.4481927016

H -1.0368680528 0.9322818511 -3.388506295

H -1.3340078011 -0.6083746434 -2.5794154036

H -2.405972871 0.7619325618 -2.2649802457

C -1.3697658398 -1.7622967264 1.1545649983

H -1.0418370793 -2.8042857101 1.2311521733

H -1.3393616004 -1.3334365979 2.1609814943

H -2.4091274347 -1.7445695853 0.8147827881

C -1.3692559538 2.4786694833 1.2935086246

H -1.3363886552 3.1358348449 0.4189857536

H -2.4092912079 2.1768774783 1.4461054101

H -1.0421664885 3.0655479545 2.1582252972

Et<sub>3</sub>NH<sup>+</sup>

(charge: +1, multiplicity: singlet, E = -292.20220 Hartree)

N -0.0001534853 -0.0002318298 0.7124015826

C 1.1103084192 -0.9419576019 0.7001775337

H 2.030876071 -0.3843527024 0.8785863805

H 0.9500046 -1.6331945424 1.5375597055

C -1.370954037 -0.4909453493 0.6992972598

H -1.3484020251 -1.5672675987 0.8760191067

H -1.8893575341 -0.0077378289 1.5374600841

C 0.2602359399 1.4322791071 0.6994660617

H -0.6831303443 1.9507424606 0.8767317343

H 0.9383647838 1.6396732598 1.5372317302

C 0.9088230914 1.8935576006 -0.6206607156

H 1.0730735942 2.9715365447 -0.5542557477

H 1.8753943789 1.4134176083 -0.7873304092

H 0.2549442218 1.6921865456 -1.471282665

C 1.186938147 -1.7339227911 -0.6200735487

H 2.0382397942 -2.4152366904 -0.5528493299

H 0.2880164541 -2.3308358843 -0.7879564063

H 1.3405468807 -1.0667492211 -1.4703404097

C -2.0952206445 -0.1590415258 -0.6203031895

H -2.1626272169 0.9181904671 -0.786474274

H -1.5945142042 -0.624313355 -1.471462375

H -3.1109408848 -0.5556266728 -0.5534881085

O<sub>2</sub>

(charge: 0, multiplicity: triplet, E = -150.31706 Hartree)

O 0. 0. 0.6070803132

O 0. 0. -0.6070803132

Benzene

(charge: 0, multiplicity: singlet, E = -232.27201 Hartree)

C -0.6374300675 0.1424117976 0.000074399

C 0.7586503252 0.142383002 0.0005823832

C 1.4566584626 1.3512093239 -0.0000887348

C 0.7586719689 2.5603037916 -0.0010253548

C -0.637204199 2.5603308209 -0.0014195517  
C -1.335317186 1.3513359036 -0.0009830972  
H -1.1803024831 -0.797947708 0.0004346786  
H 1.3013944682 -0.798061823 0.0013718544  
H 2.5424643685 1.351304813 0.0001681936  
H 1.301779847 3.5005197716 -0.001450981  
H -1.1801659076 3.5006426106 -0.0022427996  
H -2.4211305172 1.3515078963 -0.0013319897

Phenol

(charge: 0, multiplicity: singlet, E = -307.49338 Hartree)

C -1.330573969 -0.4200406433 0.0000022291  
C -0.3024519663 -1.3683493602 0.0000112152  
C 1.0334739729 -0.9540093509 0.000004988  
C 1.3360498675 0.4078690946 -0.0000085127  
C 0.3167713222 1.3600767613 -0.0000187839  
C -1.0146776848 0.9363448712 -0.0000147143  
H -2.359285077 -0.7635681954 0.00000912

H 1.8310612033 -1.6939194494 0.0000115914  
H 2.375758915 0.7216662808 -0.0000122751  
H 0.5558797003 2.4184466518 -0.0000289837  
H -1.8171592679 1.6682076537 -0.0000224621  
O -0.6638524958 -2.6866183322 0.0000222188  
H 0.1339975095 -3.230921402 0.0000382992

**1**

(charge: +3, multiplicity: triplet, E = -2052.32114 Hartree)

C 2.0890373317 4.0079252828 -0.3564226103  
C 0.9308036211 4.6095594727 -0.7874128719  
C -0.2692191925 3.8597985421 -0.8147561687  
C -0.2379530807 2.5027598849 -0.363954093  
C 2.0476128952 2.6468139636 0.0105845891  
H -1.5266456079 5.4296486051 -1.6253218289  
H 3.0261910734 4.5519056818 -0.321986892  
H 0.9233394887 5.6451140371 -1.1137338278  
C -1.4934089323 4.4050868077 -1.2671734255



C -2.5373003506 2.32476008 -0.7057487776

C -2.6271842348 3.630029513 -1.225631743

H -3.5863930387 4.0151223697 -1.5522413441

N 0.9296909334 1.9158181779 0.0096358265

N -1.3923938111 1.7661229646 -0.2918586257

Cu 1.5351737372 -0.2626809664 0.0115935349

Cu -1.8526258131 -0.1723953414 0.4835290101

C 3.3155859025 1.9271197767 0.4158163334

H 4.2001641427 2.5262007275 0.1738791506

H 3.3086944743 1.7684098758 1.4984550432

C -3.7804656424 1.4830423897 -0.5495118767

H -3.8585602593 0.7723952641 -1.3807403972

H -4.6787735134 2.1105339974 -0.5631840507

N 3.3804742407 0.6009169518 -0.2451708165

N -3.690892614 0.7174456531 0.7200125851

C 4.334509029 -0.3169832532 0.4310143083

H 4.4820407919 -1.1784519973 -0.2297650299

H 5.310355284 0.1636006553 0.5669291594  
C 3.6660039993 0.722986035 -1.7012056332  
H 4.7456299457 0.7462040613 -1.8839533361  
H 3.2623376184 1.6818728559 -2.0423132152  
C -4.7425777067 -0.3340073667 0.7909084536  
H -4.8740870036 -0.594689758 1.8459333556  
H -5.7040258525 0.05755021 0.4398076603  
C -3.8060956477 1.6332626331 1.8864925426  
H -3.0378072808 2.404553123 1.8308393127  
H -4.7916561288 2.1114653451 1.901845194  
C -4.3354023613 -1.5680935435 0.0295634773  
C -5.2556593938 -2.4821677666 -0.4734800213  
C -4.7848567937 -3.6471717291 -1.0805798091  
H -6.3197302662 -2.2896467242 -0.3858775931  
C -2.548139373 -2.8912022642 -0.6681583424  
C -3.4075662311 -3.8576766905 -1.1747640605  
H -5.482894923 -4.3778609789 -1.4759108417

H -1.4706302251 -2.9864038065 -0.7254488477

H -3.0060771413 -4.7516725925 -1.637891378

C 2.9919218974 -0.3842609861 -2.4735265941

C 3.4657328447 -0.849334432 -3.6956354494

C 2.7242698684 -1.8132815214 -4.3812204641

H 4.3940565148 -0.4652758681 -4.1050484782

C 1.1340040981 -1.7823628641 -2.5885460618

C 1.5350216107 -2.2831471512 -3.82162545

H 3.073029003 -2.1936650465 -5.3356717821

H 0.2304188393 -2.1134830463 -2.0912601676

H 0.9355104669 -3.0319884584 -4.3261763444

C 3.7612626635 -0.7806359284 1.7483609738

C 4.5575522157 -1.1587363426 2.8244588191

C 3.9419307841 -1.619391787 3.9889036781

H 5.6382519217 -1.0978590137 2.7520552919

C 1.8187596101 -1.2622174288 2.935157744

C 2.548080776 -1.6694256841 4.0459304842

H 4.5408657979 -1.926403033 4.8399661418  
H 0.7335637088 -1.2623177577 2.9360205598  
H 2.0363610778 -2.0138424028 4.9373032502  
N 2.4122874883 -0.8333111093 1.8064411823  
N 1.8481706462 -0.8526116905 -1.9312034903  
N -3.0050470967 -1.7724039279 -0.0739057347  
O -0.1892039186 -1.1055790572 0.2309272881  
H -0.1335052592 -1.7727698147 0.9277123425  
H -3.6719401854 1.059875237 2.8022326583  
O -1.6854578789 -0.7248859044 2.7941912494  
H -1.5247201316 -0.1297372683 3.5400593434  
H -2.1792084525 -1.4741728715 3.1577769306

**Int1**

(charge: +3, multiplicity: triplet, E = -2050.99335 Hartree)

C -2.0440959814 -3.4915258543 -1.877659343  
C -0.8651932362 -4.1112033757 -2.2062158914  
C 0.353624803 -3.5419209305 -1.7684510455

C 0.3127133703 -2.3308377535 -1.0083538924

C -1.9996192608 -2.2963061354 -1.1278272793

H 1.6365850813 -5.0612063419 -2.6287092169

H -2.9992737873 -3.9017838659 -2.1853270519

H -0.8519760796 -5.0274650297 -2.7884639217

C 1.601908055 -4.1453706869 -2.0463421071

C 2.6438632602 -2.3982685603 -0.7905296719

C 2.749526639 -3.5756032365 -1.55151133

H 3.7225124155 -4.0216254184 -1.7238108271

N -0.8680398138 -1.7152966018 -0.7163129422

N 1.4787862889 -1.7811574551 -0.5365386506

Cu -1.4844486173 0.373283707 0.1765080023

Cu 1.9077940946 -0.0364431398 0.4909960271

C -3.3070784209 -1.6639737812 -0.7105213351

H -4.1226262909 -2.0041726643 -1.3585266136

H -3.5392949061 -2.0000943283 0.305304885

C 3.8917804153 -1.7630642022 -0.2204983448

H 4.2914505263 -1.0382141167 -0.9398377977

H 4.6661718713 -2.520052581 -0.0513080023

N -3.2364852146 -0.1887482563 -0.7013720202

N 3.5696160128 -1.0483122608 1.0384168533

C -4.2864588758 0.4012122094 0.1738726127

H -4.3091109359 1.4790236602 -0.0181844113

H -5.2741030337 -0.0002470904 -0.0799377996

C -3.2646927253 0.373611771 -2.0783662926

H -4.2891937361 0.3976090693 -2.4661235916

H -2.6857638106 -0.2961696513 -2.723018853

C 4.6271006355 -0.0653365054 1.4078683749

H 4.522032557 0.1417384276 2.4777725696

H 5.6234058245 -0.496212155 1.25979457

C 3.3188631324 -2.0052095997 2.1524209072

H 2.5545974731 -2.7235903626 1.8550937592

H 4.2388357998 -2.5439510153 2.4047392471

C 4.4562282079 1.2204385051 0.6388532362

C 5.5037780349 2.1008940849 0.3913590742

C 5.2334135632 3.304014449 -0.2625529406

H 6.5113913203 1.8523474364 0.7073730715

C 2.9298043801 2.6562321743 -0.3899957817

C 3.9246347913 3.5865349361 -0.6600941366

H 6.0343333542 4.007867402 -0.4640665417

H 1.9003312107 2.8120663918 -0.6894303351

H 3.6814297418 4.5076594393 -1.1769195784

C -2.636342709 1.7437307496 -2.0843646347

C -3.0171787386 2.755191286 -2.9595920137

C -2.3589514709 3.9847173681 -2.8946583845

H -3.8174903378 2.5884783803 -3.6726817911

C -1.0315868779 3.1122241461 -1.0999205654

C -1.3523793511 4.1681951051 -1.9449838631

H -2.6400114274 4.7912132641 -3.5639345082

H -0.2801298968 3.20055053 -0.32429734

H -0.8375201114 5.1172797346 -1.849403146

C -3.9380039354 0.1373858426 1.6187539835

C -4.9038999272 -0.0126122982 2.6060997996

C -4.4939004121 -0.2299993567 3.9232027761

H -5.9570867721 0.0401572588 2.3514266279

C -2.220247537 -0.1522897707 3.1620872581

C -3.1301059055 -0.3053821471 4.2030268585

H -5.2285339403 -0.3469142504 4.713107562

H -1.1520222177 -0.1953183754 3.3270495081

H -2.7717097552 -0.4825462134 5.21053903

N -2.6132859797 0.0713562744 1.8941239803

N -1.6509212853 1.9210878952 -1.1785283691

N 3.1916982424 1.5015245082 0.251954079

O 0.2809049211 0.9973208328 0.7445249123

O 0.4893271504 0.9318514206 2.1927367907

H 0.6481060753 1.867592314 2.4112440142

H 2.9724520651 -1.4556302058 3.0287247921

**Int2**



(charge: +2, multiplicity: triplet, E = -2050.76731 Hartree)

C -2.8299389775 3.6906098891 -0.8403831474

C -1.8023005708 4.2197568202 -1.5808667137

C -0.5746466621 3.5189379297 -1.6644621704

C -0.4503486079 2.2819779067 -0.9683925294

C -2.6488146899 2.443746385 -0.2001466129

H 0.4652618629 4.9195380849 -2.9525737244

H -3.777469338 4.2082899023 -0.7420896478

H -1.9126788883 5.1693796126 -2.0954125104

C 0.537866349 3.9846204195 -2.4055799226

C 1.7415547908 2.0391759581 -1.6741178843

C 1.6892314478 3.2378927662 -2.4239309077

H 2.5579936437 3.557899921 -2.9885678387

N -1.5049421042 1.7640133394 -0.2737444431

N 0.7149935901 1.5728586099 -0.9691589136

Cu -1.4927943043 0.0135648967 0.7678803172

Cu 1.4582077103 -0.2017102666 0.3482662311

C -3.8052102774 1.8054613237 0.5452360352  
H -4.4727032069 2.5893934142 0.9280615094  
H -4.3831010823 1.2377580919 -0.1937984814  
C 3.0519702094 1.2827666554 -1.6132097249  
H 3.684431467 1.7753317178 -0.8659025315  
H 3.5772421183 1.3646771572 -2.5745175943  
N -3.363674165 0.8940231923 1.6070636285  
N 2.8895456465 -0.121102215 -1.2101064315  
C -4.239377373 -0.27751888 1.7452739192  
H -3.9207827934 -0.817193175 2.6441605044  
H -5.293489084 -0.0011273869 1.8915257737  
C -3.1412957448 1.5951413833 2.882891037  
H -4.0753207602 1.9928773092 3.3036134923  
H -2.4483182463 2.4238148636 2.7189009727  
C 4.1254098594 -0.6580700275 -0.5946286858  
H 4.0214699128 -1.7474544184 -0.5474645644  
H 5.0082336588 -0.4404691649 -1.2088763988

C 2.3712670719 -0.9701250991 -2.3027187409

H 1.635944608 -0.3767162499 -2.8561808813

H 3.1646212262 -1.2481351353 -3.0078822316

C 1.6905949556 -2.2011307605 -1.7450977177

C 1.7013875447 -3.4241800982 -2.4079269149

C 0.4144131431 -3.0818026047 -0.0087939543

C 1.0283703507 -4.5068144409 -1.8376351862

H 2.2331369574 -3.5299193994 -3.3475898674

C 0.3774953437 -4.3337617831 -0.6172825734

H -0.0632122264 -2.8720096841 0.9429271158

H 1.0273394172 -5.471830241 -2.3338059347

H -0.1399706099 -5.1535623525 -0.1324154995

C 4.2902640334 -0.1175077685 0.8106389125

C 5.5300774457 0.0554267325 1.4157758872

C 5.5747095811 0.4884728482 2.7428183994

H 6.4415157583 -0.1500946571 0.8645172667

C 3.1788315072 0.555379493 2.745826723

C 4.3820011356 0.7396879081 3.4204963616  
H 6.5295990623 0.6279175006 3.2386706292  
H 2.2145226258 0.7268195864 3.2125125103  
H 4.3792792062 1.0735523516 4.4515717024  
C -4.1092191471 -1.2019847505 0.5499350277  
C -5.1635854365 -2.0100742045 0.1282782482  
C -4.9720655512 -2.8715117869 -0.9504584427  
H -6.1183799896 -1.962589382 0.6410515723  
C -2.7307190486 -2.0508578153 -1.1199023363  
C -3.7319348822 -2.8919785195 -1.5897160816  
H -5.7800946172 -3.5102311442 -1.2914545982  
H -1.7497419553 -2.0262668857 -1.5817586857  
H -3.5448379158 -3.5403357547 -2.4379317766  
N -2.9129623062 -1.2280026274 -0.0728684955  
N 3.1425390069 0.1409567535 1.4697845964  
N 1.0477674327 -2.0370289062 -0.5694395494  
O 0.2343858439 0.0130456266 1.8155859613

O -0.572978966 -1.10143681 2.0565479348

H -2.686981996 0.9061700453 3.597205577

### Int2A

(charge: +2, multiplicity: triplet, E = -2050.71784 Hartree)

C -1.4329518919 2.9702457042 2.5435635151

C -0.441999172 3.8548856224 2.1854088565

C 0.6231128715 3.4007671524 1.3730636621

C 0.6302532616 2.0287409229 0.9796987651

C -1.3601691852 1.6356170356 2.0844076931

H 1.700234503 5.2763051846 1.1994217255

H -2.2696787615 3.2843144285 3.1572495506

H -0.4734343516 4.8919483739 2.5054278421

C 1.6763674021 4.2301075797 0.9100082331

C 2.5716198128 2.3259575978 -0.24354862

C 2.6481549634 3.699570235 0.0953177445

H 3.4593235042 4.3113207628 -0.2841935812

N -0.3641417821 1.1707811842 1.339201537

N 1.6199158954 1.5257065668 0.2035750965

Cu -1.2209417245 -0.5653870375 -0.0184972682

Cu 1.7966997986 -0.554214365 -0.9606979148

C -2.4286748822 0.63194771 2.4507038218

H -2.0015837553 -0.0522029981 3.1903618854

H -3.2859642864 1.128576845 2.9197077972

C 3.5665241434 1.7152524357 -1.2118500756

H 4.556236082 2.1753338187 -1.0982974146

H 3.2237345505 1.9188547397 -2.2319851366

N -2.8593786968 -0.1744344091 1.2833009891

N 3.6645799658 0.2449939728 -1.0627841715

C -3.8506003396 0.5506275907 0.4378535659

H -4.3742727356 -0.2034493074 -0.1591031133

H -4.5993778701 1.045657822 1.067439152

C -3.4128198636 -1.4895811458 1.7046700644

H -4.4386855223 -1.3903887059 2.0790358404

H -2.7983253517 -1.8597291032 2.5315176221

C 4.3552590802 -0.1146637789 0.2114943962

H 5.4414229564 -0.1077141314 0.0697220173

H 4.1119484909 0.6483368835 0.956733142

C 4.3493658432 -0.3648403445 -2.2346397547

H 3.7390800878 -0.1998734664 -3.1228151623

H 5.3434300455 0.0756668921 -2.3701934175

C 3.8654985534 -1.445276046 0.715102377

C 4.6002331367 -2.2938410211 1.5351380191

C 4.0022271081 -3.4711682613 1.9886818515

H 5.6183666568 -2.0409337855 1.8100211255

C 2.0190952138 -2.8824478224 0.776172577

C 2.6931904722 -3.7698289667 1.6069558075

H 4.5570772007 -4.1513794312 2.6263698805

H 1.0088195834 -3.0353345253 0.4104666916

H 2.2063330979 -4.6807326732 1.9350073094

C -3.3369073671 -2.4772490749 0.5660853844

C -4.2521089314 -3.5068149947 0.3780008598

C -4.0432432368 -4.4041155049 -0.6719552432

H -5.1076790785 -3.6059626626 1.0374538279

C -2.0665314871 -3.1785701398 -1.2591211203

C -2.9337458334 -4.2402554681 -1.5008707579

H -4.7428844582 -5.2157261531 -0.842231372

H -1.1891174927 -2.9758438291 -1.8637722406

H -2.7451398969 -4.914345556 -2.3283697792

C -3.2022089109 1.5290963969 -0.5125484147

C -3.8063266302 2.7286311792 -0.8737968071

C -3.1854626533 3.5259476003 -1.837985646

H -4.7459915735 3.0280818264 -0.4217106015

C -1.4317272658 1.8923358239 -1.9729180084

C -1.9836003667 3.0994860495 -2.3991484002

H -3.6378359299 4.4633729476 -2.1447167513

H -0.4884928851 1.5083886869 -2.3516211456

H -1.4765386508 3.68809681 -3.1552499168

N -2.0353480939 1.1282625063 -1.0501158215



N -2.2719307211 -2.3246336109 -0.243351567  
N 2.6031215789 -1.7513185505 0.3540510806  
O 0.1929349896 -1.3433014083 -0.9340747278  
O 1.2186972382 0.2599999115 -2.4347258701  
H 4.4523885477 -1.4382145208 -2.0667174852

**Int2B**

(charge: +2, multiplicity: triplet, E = -2050.72215 Hartree)

C -3.1368866112 -3.539047747 0.8319638712  
C -2.2006828671 -4.0802539459 1.6860593179  
C -0.9458786595 -3.4404937224 1.8523226969  
C -0.7087878961 -2.2516520941 1.1110363338  
C -2.8344629667 -2.3262149589 0.169181243  
H -0.0466000543 -4.7843647463 3.304752053  
H -4.0967081215 -4.0190496477 0.6759920919  
H -2.4107483856 -4.9971514114 2.2284512295  
C 0.0968268461 -3.8916255679 2.7037808687  
C 1.4366182893 -2.0424803886 1.9277887747

C 1.2757437516 -3.1869297763 2.7561429546  
H 2.0876300073 -3.5052783344 3.4014677386  
N -1.6723633082 -1.715485008 0.3224689209  
N 0.4786610949 -1.5988908542 1.1409706039  
Cu -1.5617761861 0.2381706912 -0.557195861  
Cu 1.2819083742 0.2148842133 -0.3903109638  
C -3.8404139509 -1.6048546311 -0.7031991005  
H -4.4608868458 -2.3230458989 -1.2538431689  
H -4.510589477 -1.0425810447 -0.0436000573  
C 2.7887475156 -1.3615112601 1.8575967767  
H 3.4418157628 -2.0365018155 1.2928724254  
H 3.220178521 -1.2904535587 2.8655043701  
N -3.1901144338 -0.6508230091 -1.6380426745  
N 2.8142434019 -0.0470455077 1.1860565458  
C -4.0913996763 0.4819046615 -1.9466674552  
H -3.6568056483 1.025498057 -2.7927088281  
H -5.0860862252 0.1380464595 -2.2580162072

C -2.7237515236 -1.3413351102 -2.8594368329

H -3.5688105271 -1.7361355206 -3.4367121238

H -2.0687870807 -2.1646748098 -2.5705560601

C 4.094686886 0.1166983932 0.4546462357

H 4.2718498551 1.1836946089 0.3045284346

H 4.9418280365 -0.2737330008 1.0310373422

C 2.5469207983 1.0685516583 2.117062759

H 1.5989398324 0.8476878467 2.6187277217

H 3.3290567714 1.1399364335 2.8856937279

C 2.4228676034 2.3890047947 1.3801095163

C 2.6698825855 3.601546903 2.0207825251

C 1.8967485031 3.4687000473 -0.6005465387

C 2.5029771348 4.7864705437 1.3040285715

H 2.9889586285 3.6176187035 3.0578553244

C 2.1087495677 4.7221367365 -0.0324951431

H 1.5987924098 3.3629729196 -1.6394926046

H 2.6880594265 5.7440536657 1.7794796605

H 1.978458969 5.619518847 -0.626444128

C 4.0074386284 -0.5445124308 -0.8989332633

C 5.1099927521 -1.0839345814 -1.5532915797

C 4.9461456538 -1.6082803165 -2.8360814817

H 6.0798841943 -1.0884204959 -1.0675974207

C 2.6215281505 -1.040721332 -2.7108570895

C 3.682571959 -1.5844579945 -3.4260294128

H 5.7936165768 -2.0314915395 -3.3651257515

H 1.6123651341 -0.9875587209 -3.1033441695

H 3.5171823252 -1.9808620843 -4.4210026503

C -4.1849084695 1.4039889142 -0.7518586033

C -5.3014217528 2.1843870039 -0.4713071562

C -5.2672573322 3.0355242392 0.6345422933

H -6.1788671832 2.127971798 -1.1064947956

C -3.0477370173 2.2595853894 1.0981584915

C -4.1235981655 3.074378093 1.432876484

H -6.125523422 3.6553847596 0.871890647

H -2.1280708729 2.2337599753 1.6723837632  
H -4.0650391606 3.7198039003 2.3015318285  
N -3.0851854858 1.4474396393 0.0286586264  
N 2.7878955787 -0.5353638659 -1.4762453653  
N 2.051129212 2.3294161614 0.0895242499  
O -0.1018519872 -0.0308916512 -1.7809321521  
O -0.2392115546 0.9016457743 0.6639327646  
H -2.147905889 -0.6453164488 -3.4688591447

### **TS0**

(charge: +2, multiplicity: triplet, E = -2283.01521 Hartree)

C 0.936273 -4.485853 -1.195048  
C -0.137119 -4.628718 -2.037782  
C -1.070731 -3.570285 -2.151173  
C -0.857622 -2.397946 -1.368307  
C 1.098017 -3.267427 -0.491472  
H -2.381547 -4.494181 -3.610656  
H 1.666277 -5.278918 -1.074423

|    |           |           |           |
|----|-----------|-----------|-----------|
| H  | -0.28409  | -5.538607 | -2.611594 |
| C  | -2.205164 | -3.616275 | -2.99685  |
| C  | -2.803436 | -1.429983 | -2.195564 |
| C  | -3.059689 | -2.541362 | -3.03059  |
| H  | -3.930778 | -2.536031 | -3.676271 |
| N  | 0.240575  | -2.258555 | -0.56921  |
| N  | -1.746263 | -1.366833 | -1.387898 |
| Cu | 1.183238  | -0.322189 | 0.453876  |
| Cu | -1.70193  | 0.360954  | -0.244574 |
| C  | 2.354714  | -3.078145 | 0.33193   |
| H  | 2.620551  | -4.017986 | 0.834481  |
| H  | 3.172031  | -2.854812 | -0.361861 |
| C  | -3.790003 | -0.279002 | -2.136484 |
| H  | -4.505198 | -0.509334 | -1.337395 |
| H  | -4.36439  | -0.232149 | -3.073265 |
| N  | 2.258311  | -1.970007 | 1.293914  |
| N  | -3.13891  | 0.997744  | -1.823365 |

|   |           |           |           |
|---|-----------|-----------|-----------|
| C | 3.581684  | -1.357418 | 1.550694  |
| H | 3.46692   | -0.660474 | 2.388142  |
| H | 4.326721  | -2.107419 | 1.845586  |
| C | 1.548251  | -2.365099 | 2.526644  |
| H | 2.203495  | -2.925292 | 3.206167  |
| H | 0.735161  | -3.036783 | 2.231023  |
| C | -4.025919 | 1.923001  | -1.109444 |
| H | -3.519265 | 2.894451  | -1.076293 |
| H | -4.981137 | 2.080683  | -1.632424 |
| C | -2.526083 | 1.602207  | -3.01445  |
| H | -1.854624 | 0.875421  | -3.476629 |
| H | -3.277131 | 1.913784  | -3.755377 |
| C | -4.291246 | 1.466264  | 0.312927  |
| C | -5.502775 | 1.737803  | 0.945585  |
| C | -5.688695 | 1.340163  | 2.268524  |
| H | -6.288707 | 2.253848  | 0.404236  |
| C | -3.479225 | 0.4212    | 2.220239  |

|   |           |           |           |
|---|-----------|-----------|-----------|
| C | -4.655511 | 0.6667    | 2.919173  |
| H | -6.624629 | 1.54479   | 2.777574  |
| H | -2.651318 | -0.104601 | 2.683095  |
| H | -4.758848 | 0.329814  | 3.944378  |
| C | 0.945604  | -1.166511 | 3.225153  |
| C | 0.745428  | -1.120491 | 4.602612  |
| C | 0.126549  | 0.001082  | 5.155784  |
| H | 1.069951  | -1.944724 | 5.22885   |
| C | -0.021019 | 0.933532  | 2.953157  |
| C | -0.265818 | 1.046065  | 4.317798  |
| H | -0.037851 | 0.061177  | 6.226607  |
| H | -0.290355 | 1.708203  | 2.243441  |
| H | -0.740932 | 1.936973  | 4.712205  |
| C | 4.02779   | -0.606786 | 0.314209  |
| C | 5.35526   | -0.526881 | -0.087338 |
| C | 5.66518   | 0.186628  | -1.248575 |
| H | 6.130945  | -1.017083 | 0.491205  |



|   |           |           |           |
|---|-----------|-----------|-----------|
| C | 3.33072   | 0.674967  | -1.500622 |
| C | 4.637779  | 0.791651  | -1.967539 |
| H | 6.694011  | 0.259061  | -1.5856   |
| H | 2.487979  | 1.147367  | -1.991549 |
| H | 4.835527  | 1.351538  | -2.873809 |
| N | 3.037422  | -0.011471 | -0.387135 |
| N | 0.565705  | -0.153344 | 2.424796  |
| N | -3.291075 | 0.814125  | 0.947074  |
| O | 0.101543  | 1.164592  | -0.04981  |
| O | 0.496721  | 1.807368  | -1.231015 |
| H | -1.92839  | 2.46404   | -2.714081 |
| C | 0.972948  | 3.486875  | -0.792305 |
| C | 2.02594   | 3.37435   | 0.192528  |
| C | 1.333983  | 4.036069  | -2.080316 |
| C | 3.335487  | 3.646255  | -0.138585 |
| H | 1.767177  | 3.044856  | 1.192708  |
| C | 2.652674  | 4.287129  | -2.393899 |

|   |           |          |           |
|---|-----------|----------|-----------|
| H | 0.549732  | 4.221143 | -2.806822 |
| C | 3.665952  | 4.092761 | -1.433254 |
| H | 4.118069  | 3.538537 | 0.606204  |
| H | 2.911045  | 4.675907 | -3.373808 |
| H | 4.698106  | 4.315046 | -1.682775 |
| H | -0.019958 | 3.721178 | -0.415808 |

**Int3'**

(charge: +2, multiplicity: triplet, E = -2283.02332 Hartree)

|   |              |               |               |
|---|--------------|---------------|---------------|
| C | 5.0090205824 | -2.4948613214 | -2.2322572894 |
| C | 4.7814644732 | -1.2564604467 | -2.779182451  |
| C | 3.5365040525 | -0.6197086927 | -2.5563937432 |
| C | 2.5625725544 | -1.2995151445 | -1.7680935184 |
| C | 4.0056056849 | -3.0785619157 | -1.4228369679 |
| H | 3.9301802166 | 1.1955485298  | -3.6762074977 |
| H | 5.9441754241 | -3.0194295386 | -2.3957372433 |
| H | 5.5348834787 | -0.7645433555 | -3.3868038197 |
| C | 3.2008055665 | 0.6500793272  | -3.0853977766 |

C 1.0254450591 0.4097523928 -2.0879603179

C 1.9531518613 1.1687621325 -2.8392666234

H 1.6636130129 2.1406374459 -3.2231922076

N 2.831772656 -2.5067961068 -1.1887645917

N 1.3210912343 -0.7806341674 -1.5722707999

Cu 1.7791680728 -3.5802608813 0.5728861759

Cu -0.3026240014 -1.6624451895 -0.5486201697

C 4.3048285517 -4.3916688278 -0.7307942055

H 4.8392591854 -5.0662186041 -1.4128145575

H 4.9858343429 -4.1835004942 0.100549857

C -0.398579806 0.9044164934 -1.9230269687

H -0.9752618497 0.4916079685 -2.7598435036

H -0.4278122419 1.9988433531 -2.0283023064

N 3.1000361875 -5.0394769522 -0.182572163

N -1.0153002201 0.4568495237 -0.6695079775

C 3.4132012675 -5.8442374906 1.0220126961

H 2.5208073754 -6.4283492377 1.2712283451

H 4.2285794348 -6.5533602228 0.8316586139

C 2.3568536759 -5.7990697368 -1.211073837

H 2.8303551334 -6.7684091396 -1.4116825785

H 2.39751986 -5.2158071732 -2.1370540991

C -2.4694347976 0.2935694174 -0.7900601877

H -2.862172621 0.1349835023 0.2208713345

H -2.9647675025 1.1924965321 -1.186570457

C -0.6312183971 1.3179780075 0.4568575455

H 0.4566875286 1.3213579923 0.5492043715

H -0.9853228383 2.3517659709 0.3290667812

C -2.8309707613 -0.9077132211 -1.6427146818

C -3.9845536011 -0.9208725336 -2.4238145826

C -4.30354618 -2.0633204138 -3.1559579714

H -4.622377635 -0.0438353358 -2.4554814101

C -2.3080102109 -3.07218687 -2.301724861

C -3.4462672021 -3.1613296893 -3.0943710512

H -5.1989243196 -2.0919606705 -3.7678316849

H -1.6105951388 -3.8990730527 -2.2267410022

H -3.648915193 -4.0676013508 -3.6536664803

C 0.9082864312 -5.9740913224 -0.8131642671

C 0.1323407795 -7.0537027463 -1.2265480681

C -1.209844623 -7.1004469742 -0.8462187239

H 0.5700578073 -7.8427067778 -1.8287711392

C -0.8940625889 -5.0322927776 0.3234045943

C -1.7333302906 -6.0738862866 -0.0585290541

H -1.8344421874 -7.9331679191 -1.1524583412

H -1.2301949007 -4.2043129906 0.9379408809

H -2.7679203004 -6.0828232803 0.2644996059

C 3.7578174272 -4.9139989131 2.1649782179

C 4.6608625677 -5.2511533079 3.1654177465

C 4.9133880267 -4.3269019914 4.1826455949

H 5.1594896515 -6.2143884082 3.1488401988

C 3.3776383393 -2.8247347425 3.1170244552

C 4.2677753279 -3.0935917303 4.1534525249

H 5.6130838688 -4.5671271608 4.9763570269

H 2.8411742718 -1.8880777653 3.0425142207

H 4.4396575364 -2.3451082936 4.9176921308

N 3.1246346434 -3.7198210765 2.1499555608

N 0.3936928413 -4.9875892318 -0.0558737245

N -2.0021196701 -1.9750233479 -1.5841865396

O 0.3859759687 -2.4248363114 1.1462267894

O 0.9397975829 -1.3583860481 1.9680352396

H -1.0475663309 0.9113076991 1.3799786385

C 0.1532769686 -1.3131558221 3.2147299103

C 0.206973271 -2.6050181829 3.9690616903

C 0.7258116133 -0.1504125087 3.9600522973

C 0.7704878429 -2.692925449 5.2111565594

H -0.2279672306 -3.4749910828 3.4909311059

C 1.2908828592 -0.2961195888 5.1970404239

H 0.684590788 0.8194495848 3.4754730368

C 1.3309504374 -1.5559945243 5.8457702213

H 0.7861437424 -3.6479262261 5.7284511045

H 1.6968397737 0.5737643844 5.7046918239

H 1.7687825763 -1.6439503786 6.8338344004

H -0.8796761071 -1.1073567938 2.8866267712

### Int3

(charge: +2, multiplicity: doublet, E = -2051.39018 Hartree)

C 1.9589565726 3.4989402918 -1.7987640386

C 0.8018291844 4.239048086 -1.8089817072

C -0.3865259822 3.6749912158 -1.2850885464

C -0.3294751705 2.3539830296 -0.7538538746

C 1.9395196261 2.2121889658 -1.2130350626

H -1.7059255604 5.3554379221 -1.6610948135

H 2.8811292106 3.8894701689 -2.2151718942

H 0.7814001968 5.2405609867 -2.227779094

C -1.6366034906 4.3409074889 -1.2810090617

C -2.6117642025 2.3509680553 -0.3438888225

C -2.7430865706 3.6839544226 -0.8008836866

H -3.715731215 4.1629230098 -0.7829862905  
N 0.848628523 1.6644749891 -0.6916770404  
N -1.4441992029 1.7148354725 -0.3150121766  
Cu 1.4153017568 -0.1022947278 0.5935904275  
Cu -1.5931502502 -0.2751568662 0.4158671651  
C 3.2296233881 1.42562043 -1.1195266461  
H 3.7973501802 1.5147884315 -2.0551862529  
H 3.845657248 1.8746519656 -0.333765028  
C -3.8454199284 1.5568813387 0.0399508373  
H -4.1848798469 1.0474723345 -0.8704050384  
H -4.65274992 2.2415202521 0.3378568409  
N 3.0046863668 0.0108397503 -0.7683324418  
N -3.5783443582 0.5442106766 1.0674949629  
C 4.1559242387 -0.5582105361 -0.0286524732  
H 4.0174867128 -1.6434825884 0.016484597  
H 5.1012326121 -0.3691467425 -0.5521123025  
C 2.6079862867 -0.8101196085 -1.9347056508



H 3.4730814784 -1.0521801268 -2.5644802599

H 1.919249252 -0.208251636 -2.536542813

C -4.4507223252 -0.6300410279 0.9337247669

H -4.3120045237 -1.2405268802 1.833361373

H -5.5170010252 -0.3625304757 0.89171691

C -3.6160942742 1.1284123894 2.4157628905

H -2.8843980909 1.9363164246 2.4748568119

H -4.6111313526 1.5234802071 2.668508975

C -4.0846858556 -1.4650091493 -0.2782604837

C -5.0523013653 -2.1624906242 -0.9979841493

C -4.6662179856 -2.9513402771 -2.0804650659

H -6.0954972508 -2.0847553402 -0.7105466576

C -2.4070015757 -2.2794205229 -1.6633966872

C -3.3153650975 -3.0087279632 -2.4212524145

H -5.4063917259 -3.5026771337 -2.6506129986

H -1.3478868502 -2.2906569027 -1.8943352747

H -2.9699167003 -3.6008105158 -3.2610550322

C 1.8968575807 -2.0670739912 -1.4817328738

C 1.9300515044 -3.2603092305 -2.1981759716

C 1.2169436902 -4.3567106276 -1.7092271584

H 2.5076196686 -3.3329820325 -3.1135739542

C 0.5185565799 -3.0073538399 0.1444200601

C 0.501099723 -4.2309317285 -0.5178253328

H 1.231521468 -5.2995156344 -2.2461085092

H -0.0144664054 -2.8417817889 1.0744387334

H -0.052507656 -5.0647078248 -0.1018943389

C 4.1863992651 0.0077630769 1.3738414071

C 5.364732539 0.1750213794 2.0927320761

C 5.2937644326 0.6769935376 3.3934588033

H 6.3185810675 -0.0819788134 1.6444988411

C 2.9145812593 0.8242932295 3.1419491748

C 4.0492190959 1.0105722843 3.9257417227

H 6.1984986167 0.8141563305 3.9763194383

H 1.9190119881 1.0766331275 3.4863218003

H 3.9545677427 1.4143886618 4.927079091  
N 2.9831904285 0.327400501 1.8964523046  
N 1.1961681469 -1.9527450469 -0.337387519  
N -2.774064316 -1.5263310968 -0.6093957964  
O -0.0889841831 -0.3993558261 1.7251804554  
O -0.2224309138 0.7222219547 2.6563404162  
H -0.319579138 0.2357369187 3.491890263  
H -3.3419893219 0.3664278191 3.1477200883

**TS1**

(charge: +2, multiplicity: doublet, E = -2051.36009 Hartree)

C -1.915055 -2.625757 -2.851704  
C -0.866152 -3.511292 -2.848115  
C 0.274568 -3.232478 -2.056018  
C 0.290884 -2.025350 -1.301128  
C -1.841480 -1.478696 -2.027546  
H 1.400616 -5.024968 -2.524746  
H -2.801374 -2.804493 -3.450592

|    |           |           |           |
|----|-----------|-----------|-----------|
| H  | -0.897160 | -4.419530 | -3.442005 |
| C  | 1.396378  | -4.091504 | -1.970501 |
| C  | 2.415267  | -2.499621 | -0.487808 |
| C  | 2.455975  | -3.734951 | -1.172750 |
| H  | 3.321084  | -4.379384 | -1.064705 |
| N  | -0.782232 | -1.185119 | -1.282753 |
| N  | 1.381598  | -1.670568 | -0.570759 |
| Cu | -1.366320 | 0.268493  | 0.311775  |
| Cu | 1.486446  | -0.017389 | 0.733620  |
| C  | -3.050083 | -0.573903 | -1.917145 |
| H  | -3.482378 | -0.390402 | -2.909955 |
| H  | -3.809602 | -1.107491 | -1.336264 |
| C  | 3.604774  | -2.045866 | 0.333008  |
| H  | 4.245857  | -1.450867 | -0.327664 |
| H  | 4.194355  | -2.918173 | 0.643917  |
| N  | -2.749899 | 0.689901  | -1.221214 |
| N  | 3.217691  | -1.221232 | 1.489136  |

|   |           |           |           |
|---|-----------|-----------|-----------|
| C | -3.938753 | 1.227120  | -0.515863 |
| H | -3.704848 | 2.252974  | -0.212661 |
| H | -4.810923 | 1.272397  | -1.179938 |
| C | -2.120518 | 1.687587  | -2.115118 |
| H | -2.863787 | 2.166034  | -2.765140 |
| H | -1.417279 | 1.150252  | -2.759892 |
| C | 4.227541  | -0.193811 | 1.783162  |
| H | 3.969911  | 0.258523  | 2.747579  |
| H | 5.238822  | -0.612159 | 1.886440  |
| C | 2.881754  | -2.053224 | 2.659740  |
| H | 2.053882  | -2.713036 | 2.394852  |
| H | 3.741369  | -2.648559 | 2.996240  |
| C | 4.215431  | 0.880517  | 0.715515  |
| C | 5.347771  | 1.622904  | 0.389408  |
| C | 5.253211  | 2.619465  | -0.580650 |
| H | 6.288315  | 1.419202  | 0.889874  |
| C | 2.941549  | 2.058426  | -0.842093 |

|   |           |           |           |
|---|-----------|-----------|-----------|
| C | 4.027482  | 2.841129  | -1.210651 |
| H | 6.124660  | 3.208433  | -0.846796 |
| H | 1.966806  | 2.186555  | -1.300226 |
| H | 3.915682  | 3.600136  | -1.976145 |
| C | -1.362174 | 2.717099  | -1.306457 |
| C | -1.192119 | 4.036945  | -1.715878 |
| C | -0.455060 | 4.900816  | -0.903048 |
| H | -1.633565 | 4.384223  | -2.644054 |
| C | -0.140358 | 3.092793  | 0.638440  |
| C | 0.076948  | 4.424330  | 0.296051  |
| H | -0.313097 | 5.935959  | -1.195870 |
| H | 0.233382  | 2.656297  | 1.559084  |
| H | 0.635420  | 5.072725  | 0.961435  |
| C | -4.228766 | 0.389574  | 0.710378  |
| C | -5.506089 | 0.246218  | 1.240195  |
| C | -5.669902 | -0.521553 | 2.394927  |
| H | -6.354217 | 0.724104  | 0.761426  |

|   |           |           |           |
|---|-----------|-----------|-----------|
| C | -3.311949 | -0.958204 | 2.370536  |
| C | -4.557380 | -1.137686 | 2.965731  |
| H | -6.654942 | -0.646101 | 2.832327  |
| H | -2.415587 | -1.443143 | 2.735358  |
| H | -4.648484 | -1.755476 | 3.851550  |
| N | -3.155147 | -0.201274 | 1.273562  |
| N | -0.834066 | 2.262322  | -0.155220 |
| N | 3.032667  | 1.102214  | 0.101123  |
| O | -0.064130 | -0.013404 | 1.617711  |
| O | -0.389848 | -2.358728 | 1.864263  |
| H | -0.226035 | -1.673021 | 2.543601  |
| H | 2.554849  | -1.405826 | 3.475903  |

**Int4'**

(charge: +2, multiplicity: doublet, E = -2051.36330 Hartree)

|   |           |           |           |
|---|-----------|-----------|-----------|
| C | -1.868135 | -2.752650 | -2.813201 |
| C | -0.774032 | -3.581818 | -2.827261 |
| C | 0.361577  | -3.244936 | -2.051420 |

|    |           |           |           |
|----|-----------|-----------|-----------|
| C  | 0.330439  | -2.035583 | -1.300406 |
| C  | -1.840874 | -1.602440 | -1.992272 |
| H  | 1.560030  | -4.989157 | -2.520862 |
| H  | -2.755331 | -2.980244 | -3.393731 |
| H  | -0.768265 | -4.492463 | -3.418172 |
| C  | 1.518271  | -4.056256 | -1.967312 |
| C  | 2.467636  | -2.429910 | -0.476214 |
| C  | 2.559179  | -3.660656 | -1.163745 |
| H  | 3.445893  | -4.273698 | -1.048629 |
| N  | -0.782176 | -1.248118 | -1.271565 |
| N  | 1.407419  | -1.634819 | -0.571386 |
| Cu | -1.365388 | 0.221903  | 0.259193  |
| Cu | 1.501484  | 0.065166  | 0.705915  |
| C  | -3.096017 | -0.771044 | -1.842710 |
| H  | -3.600831 | -0.657651 | -2.811382 |
| H  | -3.780478 | -1.325304 | -1.190655 |
| C  | 3.626688  | -1.948443 | 0.372080  |



|   |           |           |           |
|---|-----------|-----------|-----------|
| H | 4.274115  | -1.342511 | -0.272312 |
| H | 4.223300  | -2.809404 | 0.700978  |
| N | -2.834367 | 0.535538  | -1.214428 |
| N | 3.192452  | -1.130647 | 1.515770  |
| C | -4.027189 | 1.046169  | -0.495132 |
| H | -3.856665 | 2.108784  | -0.292712 |
| H | -4.928725 | 0.971889  | -1.115374 |
| C | -2.284112 | 1.522564  | -2.172309 |
| H | -3.072231 | 1.939453  | -2.811480 |
| H | -1.581339 | 0.990672  | -2.822011 |
| C | 4.186411  | -0.099835 | 1.850484  |
| H | 3.889269  | 0.349719  | 2.804712  |
| H | 5.193932  | -0.515580 | 1.992806  |
| C | 2.811242  | -1.966812 | 2.671594  |
| H | 2.003724  | -2.637732 | 2.372403  |
| H | 3.663107  | -2.550116 | 3.046154  |
| C | 4.212754  | 0.974969  | 0.783307  |

|   |           |          |           |
|---|-----------|----------|-----------|
| C | 5.353696  | 1.722707 | 0.503546  |
| C | 5.294720  | 2.717866 | -0.470813 |
| H | 6.273551  | 1.524170 | 1.042982  |
| C | 2.998801  | 2.145261 | -0.828504 |
| C | 4.095446  | 2.932722 | -1.152078 |
| H | 6.173570  | 3.310996 | -0.700951 |
| H | 2.043562  | 2.268480 | -1.327291 |
| H | 4.012099  | 3.690191 | -1.922687 |
| C | -1.544955 | 2.618626 | -1.435223 |
| C | -1.492294 | 3.935887 | -1.882830 |
| C | -0.766414 | 4.868482 | -1.138625 |
| H | -2.013776 | 4.228747 | -2.787959 |
| C | -0.236946 | 3.126297 | 0.419107  |
| C | -0.130358 | 4.460138 | 0.034354  |
| H | -0.713854 | 5.902647 | -1.462812 |
| H | 0.214997  | 2.746264 | 1.330125  |
| H | 0.422084  | 5.161582 | 0.649110  |

|   |           |           |           |
|---|-----------|-----------|-----------|
| C | -4.199943 | 0.317371  | 0.819606  |
| C | -5.437247 | 0.122743  | 1.423063  |
| C | -5.481461 | -0.493206 | 2.675846  |
| H | -6.345910 | 0.449306  | 0.928568  |
| C | -3.092794 | -0.679231 | 2.608725  |
| C | -4.291879 | -0.896547 | 3.281065  |
| H | -6.433610 | -0.656353 | 3.169704  |
| H | -2.133747 | -0.969691 | 3.021145  |
| H | -4.288552 | -1.375853 | 4.253055  |
| N | -3.056323 | -0.089380 | 1.405127  |
| N | -0.917336 | 2.228924  | -0.309867 |
| N | 3.054849  | 1.190497  | 0.119550  |
| O | -0.061008 | -0.071486 | 1.561042  |
| O | -0.338853 | -2.688958 | 1.569291  |
| H | -0.270228 | -1.705088 | 1.778670  |
| H | 2.437510  | -1.322088 | 3.469067  |

**Int4**

(charge: +2, multiplicity: doublet, E = -2051.40569 Hartree)

|    |           |           |           |
|----|-----------|-----------|-----------|
| C  | -1.251670 | 3.049739  | 2.539830  |
| C  | -0.180012 | 3.847888  | 2.212340  |
| C  | 0.854143  | 3.313294  | 1.409292  |
| C  | 0.752639  | 1.948960  | 1.002565  |
| C  | -1.286886 | 1.719753  | 2.063655  |
| H  | 2.081420  | 5.096104  | 1.257570  |
| H  | -2.071628 | 3.429720  | 3.138701  |
| H  | -0.127888 | 4.880487  | 2.543948  |
| C  | 1.973893  | 4.057847  | 0.958642  |
| C  | 2.717630  | 2.096412  | -0.209330 |
| C  | 2.902215  | 3.456900  | 0.142295  |
| H  | 3.762464  | 4.003525  | -0.228245 |
| N  | -0.316608 | 1.175085  | 1.339382  |
| N  | 1.699380  | 1.373439  | 0.225710  |
| Cu | -1.246348 | -0.488570 | -0.038901 |
| Cu | 1.752289  | -0.711209 | -0.955745 |
| C  | -2.459173 | 0.818515  | 2.371627  |
| H  | -2.135747 | 0.091753  | 3.123161  |
| H  | -3.288352 | 1.390795  | 2.803746  |
| C  | 3.666905  | 1.409278  | -1.168473 |
| H  | 4.681490  | 1.816926  | -1.078782 |
| H  | 3.313432  | 1.592470  | -2.188109 |
| N  | -2.905135 | 0.063586  | 1.175190  |
| N  | 3.682609  | -0.057716 | -0.974173 |
| C  | -3.766444 | 0.886942  | 0.277866  |
| H  | -4.309436 | 0.190440  | -0.369591 |
| H  | -4.511730 | 1.436427  | 0.865143  |
| C  | -3.619225 | -1.182762 | 1.559630  |
| H  | -4.651571 | -0.973989 | 1.864752  |
| H  | -3.103906 | -1.608665 | 2.426403  |
| C  | 4.299680  | -0.425403 | 0.332696  |
| H  | 5.385064  | -0.528392 | 0.228000  |
| H  | 4.112258  | 0.385691  | 1.042223  |
| C  | 4.372010  | -0.732269 | -2.104717 |
| H  | 3.801923  | -0.548220 | -3.015207 |
| H  | 5.394176  | -0.352173 | -2.212579 |
| C  | 3.669931  | -1.681145 | 0.869353  |
| C  | 4.287720  | -2.545406 | 1.766541  |
| C  | 3.571008  | -3.644596 | 2.242065  |
| H  | 5.309040  | -2.363311 | 2.082668  |
| C  | 1.708359  | -2.956036 | 0.898369  |
| C  | 2.261968  | -3.852786 | 1.804440  |
| H  | 4.033945  | -4.334969 | 2.939415  |

|   |           |           |           |
|---|-----------|-----------|-----------|
| H | 0.708653  | -3.040311 | 0.484188  |
| H | 1.683412  | -4.702759 | 2.146894  |
| C | -3.571375 | -2.184549 | 0.432816  |
| C | -4.565879 | -3.129053 | 0.203681  |
| C | -4.380726 | -4.061331 | -0.819376 |
| H | -5.463192 | -3.137359 | 0.813170  |
| C | -2.267817 | -3.034072 | -1.301644 |
| C | -3.212962 | -4.016639 | -1.580702 |
| H | -5.141285 | -4.808574 | -1.020283 |
| H | -1.339360 | -2.926755 | -1.851643 |
| H | -3.037698 | -4.722806 | -2.384042 |
| C | -2.968623 | 1.822223  | -0.600052 |
| C | -3.416976 | 3.097401  | -0.928810 |
| C | -2.653474 | 3.869778  | -1.806797 |
| H | -4.345388 | 3.476193  | -0.514650 |
| C | -1.077285 | 2.063663  | -1.925079 |
| C | -1.466409 | 3.344752  | -2.313125 |
| H | -2.982666 | 4.865248  | -2.086310 |
| H | -0.148746 | 1.610577  | -2.263824 |
| H | -0.846335 | 3.913751  | -2.996573 |
| N | -1.821304 | 1.319458  | -1.092448 |
| N | -2.452086 | -2.143023 | -0.313941 |
| N | 2.405478  | -1.899455 | 0.456077  |
| O | 0.107489  | -1.391519 | -0.934941 |
| O | 1.406332  | 0.124779  | -2.517612 |
| H | 0.641716  | -0.362004 | -2.863154 |
| H | 4.407741  | -1.805747 | -1.910005 |

## TS2

(charge: +2, multiplicity: quartet, E = -2283.68840 Hartree)

|   |           |           |           |
|---|-----------|-----------|-----------|
| C | -2.372009 | -2.473573 | -2.902788 |
| C | -1.488174 | -3.527906 | -2.870529 |
| C | -0.282732 | -3.398557 | -2.144537 |
| C | -0.010760 | -2.157243 | -1.491322 |
| C | -2.031724 | -1.285826 | -2.220486 |
| H | 0.486668  | -5.397266 | -2.500946 |
| H | -3.315900 | -2.547104 | -3.431195 |
| H | -1.712165 | -4.462323 | -3.376250 |
| C | 0.661310  | -4.446530 | -2.006517 |
| C | 1.959641  | -2.975954 | -0.610747 |
| C | 1.778133  | -4.236208 | -1.241423 |
| H | 2.520917  | -5.014587 | -1.106136 |
| N | -0.888973 | -1.122231 | -1.566245 |

|    |           |           |           |
|----|-----------|-----------|-----------|
| N  | 1.110582  | -1.966557 | -0.740391 |
| Cu | -1.212207 | 0.519926  | 0.046003  |
| Cu | 1.902359  | -0.243895 | 0.988499  |
| C  | -2.976020 | -0.101524 | -2.227213 |
| H  | -2.567128 | 0.650785  | -2.908116 |
| H  | -3.958672 | -0.394910 | -2.614488 |
| C  | 3.144473  | -2.808310 | 0.310371  |
| H  | 3.971161  | -3.451860 | -0.020953 |
| H  | 2.826952  | -3.136988 | 1.306142  |
| N  | -3.124230 | 0.538078  | -0.892571 |
| N  | 3.591431  | -1.417853 | 0.463372  |
| C  | -4.044477 | -0.200367 | 0.001178  |
| H  | -4.420545 | 0.509601  | 0.744939  |
| H  | -4.911113 | -0.588216 | -0.546836 |
| C  | -3.484247 | 1.968605  | -1.037467 |
| H  | -3.778183 | 2.338248  | -0.050350 |
| H  | -4.334751 | 2.110879  | -1.715619 |
| C  | 4.141179  | -0.851762 | -0.786050 |
| H  | 5.150742  | -1.231204 | -0.989289 |
| H  | 3.495444  | -1.155879 | -1.615590 |
| C  | 4.576409  | -1.330055 | 1.566245  |
| H  | 4.085684  | -1.647212 | 2.485817  |
| H  | 5.447766  | -1.966049 | 1.365416  |
| C  | 4.139416  | 0.654035  | -0.686093 |
| C  | 5.112839  | 1.467383  | -1.260786 |
| C  | 5.022854  | 2.848738  | -1.090642 |
| H  | 5.931842  | 1.024711  | -1.817357 |
| C  | 3.032775  | 2.497587  | 0.194054  |
| C  | 3.967684  | 3.375304  | -0.343280 |
| H  | 5.774549  | 3.502662  | -1.520336 |
| H  | 2.185614  | 2.838686  | 0.778039  |
| H  | 3.878213  | 4.441415  | -0.168184 |
| C  | -2.273341 | 2.736153  | -1.508242 |
| C  | -2.342246 | 3.893066  | -2.277946 |
| C  | -1.153685 | 4.530715  | -2.637322 |
| H  | -3.304181 | 4.283645  | -2.592393 |
| C  | 0.049046  | 2.822115  | -1.463903 |
| C  | 0.063110  | 3.982178  | -2.230557 |
| H  | -1.179053 | 5.434440  | -3.237184 |
| H  | 0.950397  | 2.340781  | -1.111879 |
| H  | 1.006928  | 4.438746  | -2.505730 |
| C  | -3.325443 | -1.305423 | 0.734807  |
| C  | -3.969410 | -2.470424 | 1.133571  |
| C  | -3.258839 | -3.409450 | 1.883549  |

|   |           |           |           |
|---|-----------|-----------|-----------|
| H | -5.007688 | -2.636225 | 0.866339  |
| C | -1.339382 | -1.964839 | 1.761295  |
| C | -1.928553 | -3.148497 | 2.201522  |
| H | -3.739528 | -4.326358 | 2.208880  |
| H | -0.294938 | -1.730793 | 1.988013  |
| H | -1.338851 | -3.848956 | 2.781948  |
| N | -2.034942 | -1.062949 | 1.046071  |
| N | -1.094979 | 2.225405  | -1.106256 |
| N | 3.112888  | 1.169516  | 0.015513  |
| O | 0.402207  | 0.973710  | 0.956349  |
| O | 1.535516  | -1.446663 | 2.397304  |
| H | 4.910934  | -0.296930 | 1.674629  |
| C | 0.003027  | 1.866642  | 2.612161  |
| C | -0.785254 | 0.914297  | 3.334548  |
| C | -0.650720 | 3.052358  | 2.131822  |
| C | -2.159629 | 1.059753  | 3.421345  |
| H | -0.294021 | 0.054449  | 3.771829  |
| C | -2.021374 | 3.181252  | 2.221981  |
| H | -0.055567 | 3.831448  | 1.667809  |
| C | -2.787700 | 2.182323  | 2.860407  |
| H | -2.750204 | 0.315889  | 3.945974  |
| H | -2.509068 | 4.073367  | 1.841030  |
| H | -3.861214 | 2.309995  | 2.963488  |
| H | 1.631607  | -0.996992 | 3.246761  |
| H | 1.061671  | 1.924621  | 2.839502  |

### Int5

(charge: +2, multiplicity: quartet, E = -2283.70535 Hartree)

|    |           |           |           |
|----|-----------|-----------|-----------|
| C  | 3.338387  | 1.902429  | -2.503779 |
| C  | 2.801906  | 3.167686  | -2.423894 |
| C  | 1.556440  | 3.351676  | -1.782723 |
| C  | 0.880521  | 2.204168  | -1.264838 |
| C  | 2.614704  | 0.826476  | -1.948224 |
| H  | 1.435966  | 5.509385  | -1.993826 |
| H  | 4.300850  | 1.727947  | -2.971445 |
| H  | 3.329224  | 4.026272  | -2.828645 |
| C  | 0.949337  | 4.620125  | -1.604934 |
| C  | -0.844889 | 3.502942  | -0.452045 |
| C  | -0.245950 | 4.695533  | -0.939704 |
| H  | -0.741214 | 5.647040  | -0.780765 |
| N  | 1.425216  | 0.963679  | -1.374686 |
| N  | -0.312849 | 2.299956  | -0.615195 |
| Cu | 1.162914  | -0.783593 | 0.131967  |

|    |           |           |           |
|----|-----------|-----------|-----------|
| Cu | -1.748561 | 0.776969  | 0.870842  |
| C  | 3.171451  | -0.580448 | -1.984713 |
| H  | 2.589493  | -1.160986 | -2.706212 |
| H  | 4.213600  | -0.577937 | -2.324206 |
| C  | -2.123952 | 3.620673  | 0.340674  |
| H  | -2.695153 | 4.496701  | 0.004075  |
| H  | -1.845272 | 3.766762  | 1.389997  |
| N  | 3.064509  | -1.265558 | -0.668671 |
| N  | -2.954889 | 2.409291  | 0.302792  |
| C  | 4.086491  | -0.803664 | 0.301167  |
| H  | 4.283094  | -1.626161 | 0.996685  |
| H  | 5.034754  | -0.577936 | -0.199608 |
| C  | 3.049571  | -2.738144 | -0.843250 |
| H  | 3.177194  | -3.191972 | 0.144547  |
| H  | 3.875971  | -3.082870 | -1.476900 |
| C  | -3.471043 | 2.112578  | -1.050061 |
| H  | -4.307137 | 2.772670  | -1.313422 |
| H  | -2.667341 | 2.285639  | -1.771770 |
| C  | -4.058979 | 2.529545  | 1.283515  |
| H  | -3.621717 | 2.629804  | 2.276454  |
| H  | -4.688427 | 3.399773  | 1.059266  |
| C  | -3.887427 | 0.664450  | -1.112204 |
| C  | -4.955933 | 0.210013  | -1.880308 |
| C  | -5.278758 | -1.146252 | -1.852934 |
| H  | -5.532497 | 0.910249  | -2.475032 |
| C  | -3.477190 | -1.476149 | -0.307248 |
| C  | -4.531736 | -2.003658 | -1.044318 |
| H  | -6.112404 | -1.522497 | -2.436712 |
| H  | -2.871510 | -2.089593 | 0.350259  |
| H  | -4.769642 | -3.058790 | -0.970381 |
| C  | 1.714554  | -3.160556 | -1.406003 |
| C  | 1.534057  | -4.300440 | -2.181745 |
| C  | 0.246974  | -4.617681 | -2.619274 |
| H  | 2.382453  | -4.925399 | -2.439256 |
| C  | -0.551171 | -2.652821 | -1.505508 |
| C  | -0.812904 | -3.776771 | -2.280580 |
| H  | 0.079018  | -5.502375 | -3.224432 |
| H  | -1.321925 | -1.958057 | -1.208190 |
| H  | -1.823923 | -3.981010 | -2.613549 |
| C  | 3.602706  | 0.384005  | 1.100179  |
| C  | 4.479710  | 1.316110  | 1.640157  |
| C  | 3.967147  | 2.335644  | 2.445411  |
| H  | 5.543566  | 1.241434  | 1.441146  |
| C  | 1.766819  | 1.432843  | 2.089988  |



|   |           |           |           |
|---|-----------|-----------|-----------|
| C | 2.594893  | 2.389290  | 2.674475  |
| H | 4.632876  | 3.073209  | 2.881746  |
| H | 0.679905  | 1.464674  | 2.220960  |
| H | 2.154975  | 3.163456  | 3.292697  |
| N | 2.272337  | 0.449213  | 1.323378  |
| N | 0.682284  | -2.361073 | -1.075557 |
| N | -3.151218 | -0.172741 | -0.354497 |
| O | -0.553423 | -0.784753 | 1.043711  |
| O | -1.200468 | 1.746973  | 2.395157  |
| H | -4.675275 | 1.629539  | 1.249998  |
| C | -0.467688 | -1.450309 | 2.348667  |
| C | 0.733461  | -2.355441 | 2.372922  |
| C | -1.751523 | -2.195861 | 2.567382  |
| C | 0.614444  | -3.713696 | 2.252351  |
| H | 1.706072  | -1.892811 | 2.513192  |
| C | -1.826821 | -3.554648 | 2.440614  |
| H | -2.641491 | -1.607378 | 2.774931  |
| C | -0.659493 | -4.333578 | 2.226214  |
| H | 1.503285  | -4.339086 | 2.233769  |
| H | -2.784346 | -4.057804 | 2.541788  |
| H | -0.737096 | -5.410796 | 2.128591  |
| H | -1.448967 | 1.278771  | 3.203002  |
| H | -0.348457 | -0.661332 | 3.103300  |

### TS3

(charge: +2, multiplicity: doublet, E = -2283.69539 Hartree)

|    |           |           |           |
|----|-----------|-----------|-----------|
| C  | -0.788623 | 3.765994  | -2.181658 |
| C  | -2.107561 | 3.840580  | -1.800610 |
| C  | -2.679674 | 2.754164  | -1.099966 |
| C  | -1.865164 | 1.605158  | -0.856050 |
| C  | -0.045743 | 2.607617  | -1.852143 |
| H  | -4.654138 | 3.601711  | -0.798727 |
| H  | -0.309335 | 4.584025  | -2.707638 |
| H  | -2.707697 | 4.719339  | -2.016669 |
| C  | -4.016865 | 2.738636  | -0.630768 |
| C  | -3.624660 | 0.513677  | 0.185421  |
| C  | -4.492170 | 1.620883  | 0.009738  |
| H  | -5.516223 | 1.566988  | 0.362638  |
| N  | -0.562763 | 1.552504  | -1.237686 |
| N  | -2.361756 | 0.514232  | -0.212956 |
| Cu | 1.429664  | 0.626245  | 0.182645  |
| Cu | -1.344517 | -1.464695 | 0.637871  |
| C  | 1.442587  | 2.556641  | -2.106145 |

|   |           |           |           |
|---|-----------|-----------|-----------|
| H | 1.683939  | 1.676500  | -2.710028 |
| H | 1.768204  | 3.449070  | -2.658277 |
| C | -4.130038 | -0.750945 | 0.847160  |
| H | -5.212760 | -0.852623 | 0.693048  |
| H | -3.936612 | -0.683458 | 1.922720  |
| N | 2.183242  | 2.438701  | -0.828507 |
| N | -3.404633 | -1.939983 | 0.354082  |
| C | 1.924508  | 3.561505  | 0.096681  |
| H | 2.806649  | 3.680888  | 0.733527  |
| H | 1.793166  | 4.509555  | -0.440051 |
| C | 3.611456  | 2.179036  | -1.077488 |
| H | 4.166908  | 2.449886  | -0.173601 |
| H | 4.009544  | 2.796391  | -1.893718 |
| C | -3.619451 | -2.165845 | -1.096410 |
| H | -4.463327 | -2.844507 | -1.265811 |
| H | -3.877697 | -1.212824 | -1.566151 |
| C | -3.776689 | -3.148575 | 1.120162  |
| H | -3.552615 | -2.996222 | 2.175814  |
| H | -4.845567 | -3.372858 | 1.014350  |
| C | -2.370315 | -2.683036 | -1.768215 |
| C | -2.408264 | -3.394803 | -2.965441 |
| C | -1.208035 | -3.751528 | -3.577430 |
| H | -3.361853 | -3.661730 | -3.408466 |
| C | -0.044879 | -2.693432 | -1.771654 |
| C | -0.003003 | -3.387548 | -2.973934 |
| H | -1.213647 | -4.307302 | -4.509256 |
| H | 0.844105  | -2.382832 | -1.239463 |
| H | 0.950651  | -3.644853 | -3.420274 |
| C | 3.873233  | 0.712609  | -1.348270 |
| C | 4.934861  | 0.291865  | -2.145664 |
| C | 5.207045  | -1.071355 | -2.249724 |
| H | 5.543012  | 1.023662  | -2.666832 |
| C | 3.354805  | -1.481339 | -0.787763 |
| C | 4.408577  | -1.974459 | -1.547503 |
| H | 6.031750  | -1.420745 | -2.862030 |
| H | 2.706924  | -2.132169 | -0.215656 |
| H | 4.597609  | -3.041253 | -1.584305 |
| C | 0.732834  | 3.307136  | 1.002924  |
| C | -0.080998 | 4.346613  | 1.440124  |
| C | -1.126316 | 4.065396  | 2.321703  |
| H | 0.101872  | 5.359329  | 1.096659  |
| C | -0.478142 | 1.757682  | 2.247516  |
| C | -1.324408 | 2.750348  | 2.734981  |
| H | -1.772153 | 4.862372  | 2.675776  |

|   |           |           |           |
|---|-----------|-----------|-----------|
| H | -0.630514 | 0.716734  | 2.516694  |
| H | -2.121999 | 2.484652  | 3.419120  |
| N | 0.530461  | 2.033814  | 1.400978  |
| N | 3.083810  | -0.166314 | -0.698055 |
| N | -1.203841 | -2.353493 | -1.184335 |
| O | 0.597560  | -1.121487 | 0.812625  |
| O | -1.533673 | -1.166467 | 2.519403  |
| H | -3.198622 | -3.998943 | 0.752523  |
| C | 1.120040  | -1.659302 | 2.020611  |
| C | 2.063121  | -0.788350 | 2.744803  |
| C | 1.528043  | -3.073806 | 1.926384  |
| C | 3.160873  | -1.303337 | 3.398265  |
| H | 1.813835  | 0.263321  | 2.825920  |
| C | 2.631099  | -3.556448 | 2.580982  |
| H | 0.891488  | -3.732502 | 1.341498  |
| C | 3.455273  | -2.676634 | 3.321780  |
| H | 3.810166  | -0.648431 | 3.970459  |
| H | 2.887092  | -4.609951 | 2.528735  |
| H | 4.326476  | -3.067518 | 3.837278  |
| H | -1.912947 | -1.913917 | 2.999075  |
| H | 0.178164  | -1.646133 | 2.690883  |

### Int6

(charge: +2, multiplicity: doublet, E = -2283.77658 Hartree)

|    |           |           |           |
|----|-----------|-----------|-----------|
| C  | 0.850144  | 4.054073  | -1.578814 |
| C  | -0.212277 | 4.677736  | -0.969301 |
| C  | -1.234141 | 3.882020  | -0.397645 |
| C  | -1.077997 | 2.464676  | -0.455020 |
| C  | 0.896983  | 2.637428  | -1.615427 |
| H  | -2.558621 | 5.478418  | 0.236972  |
| H  | 1.643442  | 4.629181  | -2.043258 |
| H  | -0.288211 | 5.760304  | -0.936852 |
| C  | -2.415294 | 4.403108  | 0.186237  |
| C  | -3.148448 | 2.147755  | 0.564304  |
| C  | -3.383461 | 3.540322  | 0.645621  |
| H  | -4.315543 | 3.909139  | 1.059726  |
| N  | -0.024972 | 1.865245  | -1.058202 |
| N  | -2.027859 | 1.638179  | 0.069968  |
| Cu | 1.553822  | -0.223143 | -0.082162 |
| Cu | -1.912095 | -0.540375 | 0.339860  |
| C  | 2.003633  | 1.928158  | -2.369664 |
| H  | 1.529047  | 1.347065  | -3.165552 |
| H  | 2.661818  | 2.668407  | -2.847785 |

|   |           |           |           |
|---|-----------|-----------|-----------|
| C | -4.185227 | 1.153202  | 1.054800  |
| H | -5.195422 | 1.544519  | 0.873095  |
| H | -4.083378 | 1.023960  | 2.136709  |
| N | 2.769876  | 0.992413  | -1.532427 |
| N | -3.998388 | -0.169904 | 0.429259  |
| C | 3.684656  | 1.694263  | -0.610514 |
| H | 4.427393  | 0.966231  | -0.267312 |
| H | 4.231641  | 2.499029  | -1.122054 |
| C | 3.489451  | -0.003299 | -2.346431 |
| H | 4.371282  | 0.426484  | -2.843065 |
| H | 2.806422  | -0.333826 | -3.136391 |
| C | -4.440416 | -0.175627 | -0.986205 |
| H | -5.524468 | -0.325481 | -1.058602 |
| H | -4.215692 | 0.805535  | -1.417077 |
| C | -4.679422 | -1.236540 | 1.198389  |
| H | -4.254971 | -1.282181 | 2.201465  |
| H | -5.758715 | -1.050211 | 1.264463  |
| C | -3.692398 | -1.217207 | -1.786769 |
| C | -4.224335 | -1.834194 | -2.915194 |
| C | -3.418945 | -2.707270 | -3.647256 |
| H | -5.247303 | -1.633217 | -3.214759 |
| C | -1.646741 | -2.296034 | -2.087675 |
| C | -2.105870 | -2.935967 | -3.233366 |
| H | -3.812608 | -3.202471 | -4.528741 |
| H | -0.642729 | -2.427414 | -1.699594 |
| H | -1.451507 | -3.604274 | -3.781016 |
| C | 3.895284  | -1.214088 | -1.531919 |
| C | 5.063434  | -1.917866 | -1.814601 |
| C | 5.352158  | -3.073436 | -1.088964 |
| H | 5.733115  | -1.566353 | -2.592602 |
| C | 3.327157  | -2.715570 | 0.139825  |
| C | 4.464489  | -3.482401 | -0.095470 |
| H | 6.255121  | -3.639099 | -1.293362 |
| H | 2.616648  | -2.986288 | 0.912934  |
| H | 4.648698  | -4.372585 | 0.495073  |
| C | 2.971503  | 2.236278  | 0.608863  |
| C | 3.271245  | 3.487284  | 1.145015  |
| C | 2.614596  | 3.907207  | 2.301045  |
| H | 4.010070  | 4.119562  | 0.663925  |
| C | 1.434668  | 1.827720  | 2.284728  |
| C | 1.674138  | 3.059570  | 2.885757  |
| H | 2.834281  | 4.875895  | 2.737558  |
| H | 0.720830  | 1.125934  | 2.706433  |
| H | 1.145001  | 3.341362  | 3.789265  |

|   |           |           |           |
|---|-----------|-----------|-----------|
| N | 2.062592  | 1.418340  | 1.174157  |
| N | 3.043815  | -1.604180 | -0.562104 |
| N | -2.431764 | -1.464877 | -1.383656 |
| O | -0.108469 | -1.251264 | 0.422872  |
| O | -1.868530 | -0.280891 | 2.510104  |
| H | -1.237589 | -0.949422 | 2.842819  |
| H | -4.517314 | -2.193786 | 0.699257  |
| C | 0.004749  | -2.220862 | 1.369907  |
| C | 0.773531  | -1.997889 | 2.530963  |
| C | -0.666775 | -3.448830 | 1.225876  |
| C | 0.880863  | -2.991365 | 3.509594  |
| H | 1.326936  | -1.067706 | 2.622103  |
| C | -0.561114 | -4.426873 | 2.213533  |
| H | -1.259368 | -3.627459 | 0.335146  |
| C | 0.210928  | -4.206158 | 3.358539  |
| H | 1.491586  | -2.812019 | 4.389026  |
| H | -1.080695 | -5.371381 | 2.086072  |
| H | 0.291208  | -4.973820 | 4.120092  |
| H | -1.472090 | 0.574766  | 2.723311  |

### TS1'

(charge: +2, multiplicity: doublet, E = -2051.34048 Hartree)

|    |           |           |           |
|----|-----------|-----------|-----------|
| C  | 1.595341  | -2.857569 | 2.417795  |
| C  | 0.621507  | -3.782348 | 2.126413  |
| C  | -0.512671 | -3.371633 | 1.389120  |
| C  | -0.582046 | -2.010245 | 0.963964  |
| C  | 1.445809  | -1.528922 | 1.957060  |
| H  | -1.555027 | -5.273433 | 1.375068  |
| H  | 2.474517  | -3.131674 | 2.989895  |
| H  | 0.706675  | -4.813319 | 2.456103  |
| C  | -1.587261 | -4.234828 | 1.060111  |
| C  | -2.650445 | -2.377828 | -0.024994 |
| C  | -2.659529 | -3.740387 | 0.359725  |
| H  | -3.502781 | -4.371247 | 0.100648  |
| N  | 0.405337  | -1.114257 | 1.240680  |
| N  | -1.657032 | -1.551442 | 0.266587  |
| Cu | 1.351673  | 0.488398  | -0.346979 |
| Cu | -1.956163 | 0.329708  | -0.984065 |
| C  | 2.482024  | -0.487562 | 2.338018  |
| H  | 2.015029  | 0.167080  | 3.079914  |
| H  | 3.334090  | -0.974272 | 2.830110  |
| C  | -3.800062 | -1.831597 | -0.852091 |
| H  | -4.743288 | -2.304373 | -0.546983 |

|   |           |           |           |
|---|-----------|-----------|-----------|
| H | -3.622484 | -2.101655 | -1.898734 |
| N | 2.920591  | 0.343307  | 1.204863  |
| N | -3.901303 | -0.360752 | -0.788374 |
| C | 4.007003  | -0.291914 | 0.424195  |
| H | 4.428909  | 0.476499  | -0.233521 |
| H | 4.815697  | -0.640645 | 1.080637  |
| C | 3.238261  | 1.731501  | 1.576003  |
| H | 4.282942  | 1.849845  | 1.892356  |
| H | 2.618024  | 1.998975  | 2.437644  |
| C | -4.346958 | 0.115055  | 0.544118  |
| H | -5.440066 | 0.178883  | 0.591478  |
| H | -4.029384 | -0.616283 | 1.293777  |
| C | -4.758467 | 0.174055  | -1.872696 |
| H | -4.312440 | -0.073556 | -2.837005 |
| H | -5.771519 | -0.242368 | -1.815817 |
| C | -3.713448 | 1.441804  | 0.897942  |
| C | -4.311083 | 2.347589  | 1.769715  |
| C | -3.622937 | 3.509215  | 2.117493  |
| H | -5.299456 | 2.144570  | 2.167615  |
| C | -1.822081 | 2.793452  | 0.711465  |
| C | -2.352831 | 3.734192  | 1.584128  |
| H | -4.073244 | 4.229883  | 2.791982  |
| H | -0.841392 | 2.917957  | 0.265926  |
| H | -1.787951 | 4.625676  | 1.830400  |
| C | 2.923261  | 2.718829  | 0.468141  |
| C | 3.643983  | 3.904982  | 0.341205  |
| C | 3.267441  | 4.837879  | -0.622988 |
| H | 4.489896  | 4.091937  | 0.994274  |
| C | 1.514262  | 3.345749  | -1.269386 |
| C | 2.173578  | 4.555631  | -1.441419 |
| H | 3.819360  | 5.764975  | -0.736210 |
| H | 0.666124  | 3.083607  | -1.892734 |
| H | 1.843709  | 5.249556  | -2.205941 |
| C | 3.494021  | -1.426690 | -0.438641 |
| C | 4.188354  | -2.619239 | -0.612033 |
| C | 3.656671  | -3.587555 | -1.467166 |
| H | 5.126738  | -2.786505 | -0.093886 |
| C | 1.806405  | -2.119554 | -1.883703 |
| C | 2.447026  | -3.335803 | -2.112441 |
| H | 4.180722  | -4.524805 | -1.623181 |
| H | 0.855237  | -1.866048 | -2.343174 |
| H | 2.003977  | -4.064335 | -2.781867 |
| N | 2.327721  | -1.190709 | -1.069226 |
| N | 1.873757  | 2.439613  | -0.337730 |

|   |           |           |           |
|---|-----------|-----------|-----------|
| N | -2.490784 | 1.675329  | 0.374576  |
| O | -0.061237 | 0.398590  | -1.827894 |
| O | -1.370022 | -0.439475 | -2.567264 |
| H | 0.054279  | 1.021646  | -2.562251 |
| H | -4.815405 | 1.260277  | -1.778938 |

#### Int4"

(charge: +2, multiplicity: quartet, E = -2051.39421 Hartree)

|    |           |           |           |
|----|-----------|-----------|-----------|
| C  | 1.276494  | -3.134249 | 2.442191  |
| C  | 0.155412  | -3.898792 | 2.218886  |
| C  | -0.927211 | -3.335088 | 1.508735  |
| C  | -0.808797 | -1.989216 | 1.043205  |
| C  | 1.307036  | -1.810746 | 1.952549  |
| H  | -2.242168 | -5.059021 | 1.581616  |
| H  | 2.127002  | -3.529710 | 2.985788  |
| H  | 0.091600  | -4.921670 | 2.577414  |
| C  | -2.127878 | -4.037376 | 1.232343  |
| C  | -2.924096 | -2.076565 | 0.096861  |
| C  | -3.127021 | -3.410291 | 0.533315  |
| H  | -4.059680 | -3.915347 | 0.307365  |
| N  | 0.312518  | -1.247802 | 1.273882  |
| N  | -1.815070 | -1.396136 | 0.350744  |
| Cu | 1.372910  | 0.411860  | -0.164075 |
| Cu | -1.825696 | 0.496377  | -0.995267 |
| C  | 2.490883  | -0.927900 | 2.266899  |
| H  | 2.176847  | -0.237494 | 3.055215  |
| H  | 3.321451  | -1.520869 | 2.665771  |
| C  | -3.983856 | -1.404530 | -0.749541 |
| H  | -4.984895 | -1.732974 | -0.437936 |
| H  | -3.824761 | -1.728494 | -1.783147 |
| N  | 2.947682  | -0.112923 | 1.112064  |
| N  | -3.871564 | 0.061276  | -0.735922 |
| C  | 3.849512  | -0.887678 | 0.205689  |
| H  | 4.373025  | -0.159382 | -0.423445 |
| H  | 4.606721  | -1.422287 | 0.790551  |
| C  | 3.629640  | 1.127454  | 1.578729  |
| H  | 4.675805  | 0.928143  | 1.837219  |
| H  | 3.128892  | 1.459165  | 2.493170  |
| C  | -4.266605 | 0.640572  | 0.567639  |
| H  | -5.351758 | 0.790157  | 0.622159  |
| H  | -3.994541 | -0.068548 | 1.355947  |
| C  | -4.636225 | 0.664598  | -1.851678 |
| H  | -4.220128 | 0.307945  | -2.794622 |

|   |           |           |           |
|---|-----------|-----------|-----------|
| H | -5.699420 | 0.400631  | -1.790607 |
| C | -3.528368 | 1.933451  | 0.822654  |
| C | -4.045201 | 2.959681  | 1.608727  |
| C | -3.264091 | 4.091783  | 1.838404  |
| H | -5.042008 | 2.874042  | 2.027754  |
| C | -1.548156 | 3.109497  | 0.486716  |
| C | -1.991665 | 4.168385  | 1.269871  |
| H | -3.647393 | 4.906306  | 2.444057  |
| H | -0.580998 | 3.111551  | -0.001781 |
| H | -1.361286 | 5.037596  | 1.417740  |
| C | 3.515171  | 2.226057  | 0.553584  |
| C | 4.455121  | 3.241967  | 0.417411  |
| C | 4.211731  | 4.261571  | -0.504614 |
| H | 5.356597  | 3.236773  | 1.020735  |
| C | 2.159085  | 3.168845  | -1.089243 |
| C | 3.043862  | 4.227153  | -1.266912 |
| H | 4.928713  | 5.066128  | -0.630288 |
| H | 1.246666  | 3.055842  | -1.663855 |
| H | 2.825785  | 4.996938  | -1.998085 |
| C | 3.079943  | -1.829924 | -0.689109 |
| C | 3.553141  | -3.084330 | -1.053951 |
| C | 2.800511  | -3.847945 | -1.950437 |
| H | 4.491615  | -3.454356 | -0.655196 |
| C | 1.181415  | -2.075544 | -2.019755 |
| C | 1.601290  | -3.336034 | -2.441400 |
| H | 3.149575  | -4.828329 | -2.257683 |
| H | 0.242083  | -1.635522 | -2.356427 |
| H | 0.992431  | -3.898483 | -3.139910 |
| N | 1.916261  | -1.344446 | -1.165474 |
| N | 2.391976  | 2.197613  | -0.189389 |
| N | -2.300748 | 2.017137  | 0.274781  |
| O | 0.030132  | 1.105645  | -1.321679 |
| O | -1.657673 | -0.660349 | -2.460094 |
| H | 0.110073  | 0.657142  | -2.180070 |
| H | -4.538565 | 1.751015  | -1.805752 |

### TS2-*o*-nitrobenzene

(charge: +2, multiplicity: doublet, E = -2488.20161 Hartree)

|   |          |          |           |
|---|----------|----------|-----------|
| C | 3.930418 | 1.670747 | -2.078348 |
| C | 3.594183 | 2.998952 | -1.954362 |
| C | 2.317656 | 3.344939 | -1.457487 |
| C | 1.408577 | 2.294027 | -1.123266 |
| C | 2.976054 | 0.694606 | -1.718916 |



|    |           |           |           |
|----|-----------|-----------|-----------|
| H  | 2.566760  | 5.500876  | -1.504668 |
| H  | 4.908018  | 1.369337  | -2.437398 |
| H  | 4.299281  | 3.782688  | -2.214417 |
| C  | 1.900491  | 4.682897  | -1.248070 |
| C  | -0.170461 | 3.809526  | -0.388974 |
| C  | 0.660264  | 4.914751  | -0.715161 |
| H  | 0.306868  | 5.923436  | -0.531569 |
| N  | 1.757760  | 0.990055  | -1.282489 |
| N  | 0.174689  | 2.548271  | -0.601664 |
| Cu | 1.061789  | -0.832337 | 0.037289  |
| Cu | -1.543179 | 1.193680  | 0.708313  |
| C  | 3.305999  | -0.776386 | -1.858423 |
| H  | 2.766788  | -1.155487 | -2.731596 |
| H  | 4.376212  | -0.912834 | -2.051144 |
| C  | -1.479176 | 4.097585  | 0.307516  |
| H  | -1.892280 | 5.052201  | -0.047102 |
| H  | -1.255912 | 4.196233  | 1.374990  |
| N  | 2.892912  | -1.599698 | -0.690185 |
| N  | -2.472383 | 3.023048  | 0.188829  |
| C  | 3.852303  | -1.530569 | 0.437602  |
| H  | 3.701943  | -2.423411 | 1.050028  |
| H  | 4.887991  | -1.542045 | 0.078635  |
| C  | 2.617205  | -2.993577 | -1.121446 |
| H  | 2.542049  | -3.616170 | -0.227492 |
| H  | 3.423577  | -3.387655 | -1.751383 |
| C  | -2.972040 | 2.860378  | -1.193092 |
| H  | -3.692425 | 3.645470  | -1.455423 |
| H  | -2.121960 | 2.941121  | -1.877424 |
| C  | -3.583430 | 3.259459  | 1.139339  |
| H  | -3.175316 | 3.233288  | 2.149518  |
| H  | -4.063631 | 4.227564  | 0.949399  |
| C  | -3.588727 | 1.491275  | -1.330293 |
| C  | -4.688664 | 1.212305  | -2.136619 |
| C  | -5.191555 | -0.088676 | -2.164410 |
| H  | -5.150057 | 2.003051  | -2.718135 |
| C  | -3.488051 | -0.716740 | -0.600832 |
| C  | -4.586695 | -1.069355 | -1.376402 |
| H  | -6.053176 | -0.328041 | -2.779002 |
| H  | -2.965899 | -1.426537 | 0.028007  |
| H  | -4.962892 | -2.085847 | -1.353763 |
| C  | 1.295166  | -3.025564 | -1.843298 |
| C  | 0.982864  | -3.953005 | -2.832506 |
| C  | -0.279379 | -3.908729 | -3.423222 |
| H  | 1.715686  | -4.694334 | -3.131866 |

|   |           |           |           |
|---|-----------|-----------|-----------|
| C | -0.798103 | -2.030982 | -2.030563 |
| C | -1.183267 | -2.923978 | -3.022269 |
| H | -0.546555 | -4.623236 | -4.194743 |
| H | -1.442024 | -1.239085 | -1.680279 |
| H | -2.166122 | -2.842395 | -3.472002 |
| C | 3.591773  | -0.318152 | 1.296320  |
| C | 4.604022  | 0.323722  | 2.000299  |
| C | 4.275787  | 1.403347  | 2.821686  |
| H | 5.629302  | -0.018596 | 1.908735  |
| C | 1.983186  | 1.134677  | 2.153688  |
| C | 2.947058  | 1.813623  | 2.895819  |
| H | 5.048604  | 1.916997  | 3.384218  |
| H | 0.936984  | 1.448578  | 2.154106  |
| H | 2.648832  | 2.654510  | 3.511615  |
| N | 2.305144  | 0.081493  | 1.383287  |
| N | 0.406712  | -2.092398 | -1.446590 |
| N | -2.996014 | 0.532128  | -0.592613 |
| O | -0.701289 | -0.547012 | 0.778046  |
| O | -0.913882 | 2.029240  | 2.271656  |
| H | -4.328540 | 2.469120  | 1.031364  |
| C | -0.959945 | -1.639937 | 2.485549  |
| C | -1.007312 | -2.923393 | 1.881882  |
| C | -2.182705 | -1.132910 | 2.998440  |
| C | -2.188670 | -3.622629 | 1.685383  |
| C | -3.370922 | -1.826315 | 2.819501  |
| H | -2.182012 | -0.193213 | 3.537511  |
| C | -3.380493 | -3.067712 | 2.161087  |
| H | -2.165311 | -4.587269 | 1.194092  |
| H | -4.296644 | -1.421532 | 3.214809  |
| H | -4.310705 | -3.612189 | 2.040151  |
| H | -0.970885 | 1.442107  | 3.034512  |
| H | -0.012849 | -1.250485 | 2.828920  |
| N | 0.235211  | -3.502566 | 1.406446  |
| O | 0.202430  | -4.549821 | 0.769060  |
| O | 1.283734  | -2.874500 | 1.645527  |

### TS2-*m*-nitrobenzene

(charge: +2, multiplicity: quartet, E = -2488.19338 Hartree)

|   |           |          |          |
|---|-----------|----------|----------|
| C | -0.074530 | 3.817809 | 2.567147 |
| C | 1.194062  | 4.258676 | 2.268522 |
| C | 2.057780  | 3.420222 | 1.529157 |
| C | 1.587249  | 2.126157 | 1.143340 |
| C | -0.464908 | 2.534999 | 2.126667 |

|    |           |           |           |
|----|-----------|-----------|-----------|
| H  | 3.747681  | 4.778248  | 1.422661  |
| H  | -0.771431 | 4.438957  | 3.118324  |
| H  | 1.534603  | 5.242242  | 2.577779  |
| C  | 3.365265  | 3.802644  | 1.138329  |
| C  | 3.579186  | 1.659675  | 0.069708  |
| C  | 4.124737  | 2.925100  | 0.409801  |
| H  | 5.131058  | 3.178220  | 0.094858  |
| N  | 0.334370  | 1.708765  | 1.462371  |
| N  | 2.362682  | 1.269111  | 0.421609  |
| Cu | -1.141164 | 0.362421  | 0.094004  |
| Cu | 1.940057  | -0.820761 | -0.863264 |
| C  | -1.866206 | 2.029508  | 2.369580  |
| H  | -1.817545 | 1.151714  | 3.020289  |
| H  | -2.473934 | 2.790272  | 2.873514  |
| C  | 4.406900  | 0.721210  | -0.773674 |
| H  | 5.475873  | 0.876996  | -0.573949 |
| H  | 4.206803  | 0.961742  | -1.823242 |
| N  | -2.533950 | 1.609049  | 1.106674  |
| N  | 4.037533  | -0.691049 | -0.594123 |
| C  | -2.846705 | 2.754653  | 0.216713  |
| H  | -3.718762 | 2.479645  | -0.382791 |
| H  | -3.113842 | 3.644215  | 0.798507  |
| C  | -3.733060 | 0.798487  | 1.432989  |
| H  | -4.387045 | 0.782153  | 0.557613  |
| H  | -4.300415 | 1.243800  | 2.259249  |
| C  | 4.308970  | -1.182575 | 0.776212  |
| H  | 5.377900  | -1.381253 | 0.923448  |
| H  | 4.010821  | -0.406797 | 1.486691  |
| C  | 4.733909  | -1.528153 | -1.596629 |
| H  | 4.452542  | -1.190831 | -2.593757 |
| H  | 5.822588  | -1.453753 | -1.482865 |
| C  | 3.488925  | -2.423350 | 1.026959  |
| C  | 3.920188  | -3.479759 | 1.824924  |
| C  | 3.095245  | -4.594475 | 1.971021  |
| H  | 4.889782  | -3.434471 | 2.309013  |
| C  | 1.512390  | -3.531002 | 0.522351  |
| C  | 1.873361  | -4.626997 | 1.297410  |
| H  | 3.411492  | -5.433086 | 2.582478  |
| H  | 0.589581  | -3.504176 | -0.044697 |
| H  | 1.220345  | -5.490132 | 1.358684  |
| C  | -3.319508 | -0.612701 | 1.763363  |
| C  | -4.114379 | -1.475598 | 2.512663  |
| C  | -3.679070 | -2.783259 | 2.719000  |
| H  | -5.058723 | -1.128869 | 2.917938  |

|   |           |           |           |
|---|-----------|-----------|-----------|
| C | -1.717436 | -2.268657 | 1.444477  |
| C | -2.455988 | -3.185961 | 2.179716  |
| H | -4.283126 | -3.475099 | 3.296563  |
| H | -0.768240 | -2.500804 | 0.986688  |
| H | -2.080443 | -4.191824 | 2.327990  |
| C | -1.714260 | 3.055313  | -0.735038 |
| C | -1.532234 | 4.322653  | -1.276500 |
| C | -0.530459 | 4.513727  | -2.228912 |
| H | -2.171682 | 5.141701  | -0.964932 |
| C | 0.035558  | 2.189131  | -2.012582 |
| C | 0.258713  | 3.429191  | -2.604531 |
| H | -0.374341 | 5.493563  | -2.668375 |
| H | 0.651501  | 1.327038  | -2.267539 |
| H | 1.044721  | 3.529296  | -3.344080 |
| N | -0.935107 | 2.013302  | -1.095900 |
| N | -2.144337 | -1.013120 | 1.239890  |
| N | 2.293729  | -2.445816 | 0.407078  |
| O | -0.003578 | -0.991492 | -0.707952 |
| O | 2.042587  | 0.049181  | -2.545395 |
| H | 4.436097  | -2.570472 | -1.472192 |
| C | -0.683854 | -1.457898 | -2.409489 |
| C | -1.963828 | -0.822718 | -2.327171 |
| C | -0.657919 | -2.895677 | -2.347584 |
| C | -3.043364 | -1.562172 | -1.881352 |
| C | -1.781112 | -3.612071 | -1.979687 |
| H | 0.273116  | -3.409896 | -2.563954 |
| C | -2.987367 | -2.947445 | -1.693879 |
| H | -1.744491 | -4.694233 | -1.912249 |
| H | -3.868153 | -3.478034 | -1.355215 |
| H | 2.315732  | -0.567404 | -3.237242 |
| H | 0.112070  | -0.936656 | -2.933043 |
| H | -2.072613 | 0.231170  | -2.536206 |
| N | -4.261637 | -0.840831 | -1.504487 |
| O | -5.184305 | -1.477737 | -1.011272 |
| O | -4.254443 | 0.391381  | -1.636297 |

### TS2-*p*-nitrobenzene

(charge: +2, multiplicity: quartet, E = -2488.19338 Hartree)

|   |           |          |           |
|---|-----------|----------|-----------|
| C | -0.711240 | 3.693387 | -2.666664 |
| C | -2.063504 | 3.833320 | -2.452524 |
| C | -2.746609 | 2.858262 | -1.691260 |
| C | -2.009249 | 1.734950 | -1.203410 |
| C | -0.054947 | 2.567591 | -2.124717 |

|    |           |           |           |
|----|-----------|-----------|-----------|
| H  | -4.708785 | 3.786218  | -1.728641 |
| H  | -0.150420 | 4.433407  | -3.226369 |
| H  | -2.607207 | 4.689381  | -2.840594 |
| C  | -4.123160 | 2.946886  | -1.366049 |
| C  | -3.881881 | 0.883610  | -0.151963 |
| C  | -4.688762 | 1.964136  | -0.596059 |
| H  | -5.738394 | 1.995940  | -0.325709 |
| N  | -0.678458 | 1.610753  | -1.447683 |
| N  | -2.594815 | 0.764642  | -0.447185 |
| Cu | 0.936727  | 0.634598  | -0.007561 |
| Cu | -1.782746 | -1.187250 | 0.927023  |
| C  | 1.441204  | 2.400405  | -2.263097 |
| H  | 1.642922  | 1.536392  | -2.901741 |
| H  | 1.891079  | 3.281145  | -2.735921 |
| C  | -4.502770 | -0.165283 | 0.738857  |
| H  | -5.581521 | -0.235143 | 0.544148  |
| H  | -4.352155 | 0.148539  | 1.777682  |
| N  | 2.089479  | 2.145899  | -0.946341 |
| N  | -3.858639 | -1.481057 | 0.612074  |
| C  | 2.091357  | 3.347592  | -0.078860 |
| H  | 2.973461  | 3.293052  | 0.567040  |
| H  | 2.190528  | 4.263505  | -0.672236 |
| C  | 3.445980  | 1.580132  | -1.139344 |
| H  | 3.980708  | 1.617372  | -0.186005 |
| H  | 4.026884  | 2.161474  | -1.865897 |
| C  | -4.016316 | -2.067051 | -0.736592 |
| H  | -5.016323 | -2.498115 | -0.870501 |
| H  | -3.894060 | -1.271530 | -1.477187 |
| C  | -4.375638 | -2.399842 | 1.651672  |
| H  | -4.150460 | -1.974597 | 2.628905  |
| H  | -5.458801 | -2.539939 | 1.547525  |
| C  | -2.946031 | -3.106788 | -0.954005 |
| C  | -3.136820 | -4.252763 | -1.722043 |
| C  | -2.087177 | -5.161218 | -1.851707 |
| H  | -4.094938 | -4.434227 | -2.196995 |
| C  | -0.769821 | -3.735717 | -0.450077 |
| C  | -0.882423 | -4.903067 | -1.195936 |
| H  | -2.214087 | -6.064617 | -2.438990 |
| H  | 0.132291  | -3.482532 | 0.092561  |
| H  | -0.052588 | -5.598609 | -1.248891 |
| C  | 3.336981  | 0.137904  | -1.560032 |
| C  | 4.354351  | -0.535161 | -2.228823 |
| C  | 4.183241  | -1.887184 | -2.522689 |
| H  | 5.267984  | -0.014811 | -2.493550 |

|   |           |           |           |
|---|-----------|-----------|-----------|
| C | 2.019784  | -1.776350 | -1.498486 |
| C | 2.987748  | -2.514321 | -2.167667 |
| H | 4.968546  | -2.439367 | -3.027515 |
| H | 1.078830  | -2.196708 | -1.176909 |
| H | 2.811278  | -3.558314 | -2.399301 |
| C | 0.866003  | 3.406281  | 0.801289  |
| C | 0.366290  | 4.611256  | 1.281180  |
| C | -0.712115 | 4.589593  | 2.167154  |
| H | 0.819298  | 5.547808  | 0.973536  |
| C | -0.712845 | 2.190688  | 2.011550  |
| C | -1.251514 | 3.361225  | 2.540723  |
| H | -1.117525 | 5.517497  | 2.557367  |
| H | -1.126435 | 1.211836  | 2.268850  |
| H | -2.084446 | 3.295355  | 3.231329  |
| N | 0.327048  | 2.220865  | 1.156886  |
| N | 2.200854  | -0.484317 | -1.188724 |
| N | -1.773105 | -2.850003 | -0.344488 |
| O | 0.147150  | -0.943402 | 0.778764  |
| O | -2.156595 | -0.334101 | 2.572178  |
| H | -3.883204 | -3.369289 | 1.557200  |
| C | 1.052080  | -1.346358 | 2.439386  |
| C | 1.803532  | -0.145267 | 2.662968  |
| C | 1.771270  | -2.518754 | 2.029343  |
| C | 3.107988  | -0.044844 | 2.217278  |
| C | 3.072429  | -2.423120 | 1.586501  |
| H | 1.263172  | -3.476690 | 2.029111  |
| C | 3.703277  | -1.169689 | 1.630136  |
| H | 3.620998  | -3.275926 | 1.207915  |
| H | -2.004268 | -0.926535 | 3.319786  |
| H | 0.123293  | -1.457959 | 2.982484  |
| H | 1.323573  | 0.693248  | 3.149787  |
| H | 3.683841  | 0.865171  | 2.327242  |
| N | 5.020972  | -1.024455 | 1.009567  |
| O | 5.464150  | 0.123647  | 0.890299  |
| O | 5.577044  | -2.038448 | 0.601406  |

### TS2-CH<sub>3</sub>CN

(charge: +2, multiplicity: doublet, E = -2184.15381 Hartree)

|   |           |           |           |
|---|-----------|-----------|-----------|
| C | -1.730538 | -3.462500 | -2.163284 |
| C | -0.644229 | -4.263843 | -1.900887 |
| C | 0.517882  | -3.682873 | -1.349185 |
| C | 0.522162  | -2.277024 | -1.087911 |
| C | -1.644183 | -2.084643 | -1.872704 |

|    |           |           |           |
|----|-----------|-----------|-----------|
| H  | 1.702412  | -5.496324 | -1.227932 |
| H  | -2.642335 | -3.870979 | -2.583943 |
| H  | -0.669379 | -5.330063 | -2.104539 |
| C  | 1.681159  | -4.428830 | -1.030978 |
| C  | 2.674716  | -2.390063 | -0.241604 |
| C  | 2.758310  | -3.786242 | -0.479537 |
| H  | 3.663676  | -4.323929 | -0.220217 |
| N  | -0.566447 | -1.500105 | -1.358611 |
| N  | 1.608500  | -1.665525 | -0.548417 |
| Cu | -1.410005 | 0.392690  | -0.089531 |
| Cu | 1.861907  | 0.380852  | 0.639005  |
| C  | -2.803984 | -1.178023 | -2.208892 |
| H  | -2.515984 | -0.594043 | -3.087831 |
| H  | -3.688271 | -1.765453 | -2.480995 |
| C  | 3.827100  | -1.704212 | 0.456979  |
| H  | 4.784277  | -2.133474 | 0.131083  |
| H  | 3.701894  | -1.893487 | 1.527144  |
| N  | -3.135148 | -0.218213 | -1.124050 |
| N  | 3.816896  | -0.244017 | 0.278057  |
| C  | -3.960450 | -0.846043 | -0.047446 |
| H  | -4.416469 | -0.028463 | 0.521851  |
| H  | -4.774332 | -1.434709 | -0.486488 |
| C  | -3.831274 | 0.977312  | -1.672862 |
| H  | -4.909550 | 0.802087  | -1.759450 |
| H  | -3.454144 | 1.151519  | -2.685017 |
| C  | 4.139670  | 0.143066  | -1.115464 |
| H  | 5.224120  | 0.187956  | -1.270156 |
| H  | 3.741482  | -0.623451 | -1.787015 |
| C  | 4.726661  | 0.420219  | 1.242450  |
| H  | 4.389128  | 0.202049  | 2.254906  |
| H  | 5.757277  | 0.068626  | 1.111668  |
| C  | 3.485531  | 1.455881  | -1.455160 |
| C  | 4.012712  | 2.352294  | -2.379965 |
| C  | 3.307939  | 3.520422  | -2.666921 |
| H  | 4.962026  | 2.139411  | -2.859304 |
| C  | 1.637139  | 2.825178  | -1.096637 |
| C  | 2.097832  | 3.760025  | -2.015267 |
| H  | 3.702778  | 4.236358  | -3.380093 |
| H  | 0.715238  | 2.951116  | -0.546013 |
| H  | 1.526109  | 4.661312  | -2.203680 |
| C  | -3.540261 | 2.208148  | -0.852343 |
| C  | -4.414691 | 3.288666  | -0.779833 |
| C  | -4.017424 | 4.430592  | -0.083977 |
| H  | -5.384546 | 3.237992  | -1.263114 |

|   |           |           |           |
|---|-----------|-----------|-----------|
| C | -1.950866 | 3.329302  | 0.422844  |
| C | -2.760626 | 4.454490  | 0.522201  |
| H | -4.680345 | 5.286600  | -0.013982 |
| H | -0.974078 | 3.271878  | 0.887419  |
| H | -2.416222 | 5.323401  | 1.071141  |
| C | -3.125007 | -1.680484 | 0.894317  |
| C | -3.577053 | -2.862588 | 1.467165  |
| C | -2.744596 | -3.524829 | 2.374052  |
| H | -4.556417 | -3.255780 | 1.216237  |
| C | -1.095464 | -1.805712 | 2.042423  |
| C | -1.491036 | -2.990344 | 2.663632  |
| H | -3.073184 | -4.448066 | 2.840139  |
| H | -0.107725 | -1.363486 | 2.203767  |
| H | -0.816576 | -3.481605 | 3.355807  |
| N | -1.912668 | -1.170118 | 1.186153  |
| N | -2.333843 | 2.232307  | -0.253536 |
| N | 2.316140  | 1.696805  | -0.827788 |
| O | 0.086533  | 1.098454  | 0.798575  |
| O | 1.775110  | -0.663683 | 2.204956  |
| H | 2.047848  | -0.104577 | 2.945833  |
| H | 4.692230  | 1.499514  | 1.085853  |
| C | 1.126231  | 2.115270  | 3.453629  |
| N | 2.248350  | 2.428084  | 3.484305  |
| C | -0.218289 | 1.654953  | 3.252760  |
| H | -0.179447 | 1.299162  | 2.061530  |
| H | -0.461049 | 0.760804  | 3.827337  |
| H | -0.971651 | 2.437289  | 3.352693  |

### nitrobenzene

(charge: 0, multiplicity: singlet, E = -436.77464 Hartree)

|   |           |           |           |
|---|-----------|-----------|-----------|
| C | 1.077023  | -1.132161 | 0.000033  |
| C | 2.474325  | -1.136745 | 0.000520  |
| C | 3.178126  | 0.065083  | 0.000067  |
| C | 2.456432  | 1.256470  | -0.000880 |
| C | 1.063827  | 1.286071  | -0.001397 |
| C | 0.374657  | 0.075786  | -0.000925 |
| H | 0.534184  | -2.072169 | 0.000392  |
| H | 3.016758  | -2.076384 | 0.001266  |
| H | 4.259757  | 0.099440  | 0.000422  |
| H | 0.552952  | 2.240070  | -0.002131 |
| H | -0.710311 | 0.075966  | -0.001310 |
| N | 3.192145  | 2.530473  | -0.001373 |
| O | 2.533474  | 3.569697  | -0.002060 |



|   |          |          |           |
|---|----------|----------|-----------|
| O | 4.421466 | 2.479437 | -0.001157 |
|---|----------|----------|-----------|

**CH<sub>3</sub>CN**

(charge: 0, multiplicity: singlet, E = -132.76040 Hartree)

|   |           |           |           |
|---|-----------|-----------|-----------|
| C | 0.649397  | 0.697727  | 0.028697  |
| H | 1.007021  | -0.335675 | 0.016083  |
| H | 1.007041  | 1.203498  | -0.872559 |
| H | -0.444113 | 0.690459  | 0.016083  |
| C | 1.136112  | 1.386028  | 1.220880  |
| N | 1.522822  | 1.932904  | 2.168106  |
